# The Regulation of Thyroid Function in Pregnancy: Pathways of Endocrine Adaptation from Physiology to Pathology

DANIEL GLINOER

*Hospital Saint-Pierre, Department of Internal Medicine, Thyroid Investigation Clinic, Université Libre de Bruxelles, Belgium*

## I. Introduction

## II. The Regulation of Thyroid Function in Normal Pregnancy

- A. The thyroid hormone transport proteins
- B. The thyroid hormones
  1. Total thyroid hormones
  2. Free thyroid hormones
  3. Peripheral metabolism of thyroid hormones
- C. The serum levels of thyroglobulin (TG)
- D. The metabolism of iodine
- E. The hypothalamic-pituitary control of thyroid function and the role of hCG
  1. Hypothalamic-pituitary-thyroid axis (HPTA)
  2. Regulation of serum TSH
  3. Thyrotropic action of hCG

## F. A global view of thyroidal economy in pregnancy

## III. Pathological Alterations of Thyroidal Regulation Associated with Pregnancy

- A. IDD
  1. Consequences of iodine deficiency during pregnancy
  2. Assessment of increased thyroidal stimulation
  3. Gestational goitrogenesis and its prevention by iodine supplementation
  4. Consequences of iodine deficiency for the offspring
- B. Hypothyroidism and pregnancy
  1. Fertility and pregnancy outcome in hypothyroid women
  2. Thyroid hormone replacement in the hypothyroid pregnant woman
  3. Subclinical hypothyroidism in pregnancy
  4. Euthyroid autoimmune thyroid disorders (AITD) and pregnancy
  5. AITD and the risk of miscarriage
- C. Hyperthyroidism and pregnancy
  1. GD in the pregnant woman
  2. GTT
  3. Hyperemesis gravidarum and hyperthyroidism

## IV. Conclusions and Perspectives

## I. Introduction

THYROID disorders are observed 4- to 5-fold more frequently in women when compared with men, in particular during the childbearing period. It is therefore not unusual to encounter thyroid function abnormalities during a "routine" laboratory evaluation carried out for pregnant women. One of the aims of the present review is to underscore the rationale that allows for a correct interpretation of these alterations. Furthermore, pregnancy is accompanied by profound alterations in thyroidal economy, resulting from a complex combination of factors specific for the pregnant state: the rise in  $T_4$ -binding globulin concentrations, the effects of CG on the maternal thyroid, alterations in the requirement for iodine, modifications in autoimmune regulation, and the role of the placenta in deiodination of iodothyronines. Another aim of this review is to discuss the specific role attributed to each factor and delineate the main pathways of thyroidal adaptation, including physiology as well as pathophysiology in the pregnant state. Finally, the third aim is to discuss specific aspects of the management of hypothyroidism (related to established, subclinical, and preclinical hypothyroidism) and hyperthyroidism [both Graves' disease (GD) and gestational nonautoimmune transient thyrotoxicosis] when associated with pregnancy.

## II. The Regulation of Thyroid Function in Normal Pregnancy

Hormonal changes and metabolic demands during pregnancy result in profound alterations in the biochemical parameters of thyroid function (1). For the thyroidologist, pregnancy can be viewed as a prolonged physiological condition in which a combination of events concur to modify the thyroidal economy. Such events may act independently, synergistically, or even antagonistically to produce subtle or major thyroidal effects. Furthermore, these events take place at different time points during gestation, resulting in complex effects that may be seen only transiently or, by contrast, that persist until term (2, 3).

### A. The thyroid hormone transport proteins

Thyroid hormones (TH) are transported in serum noncovalently bound to three proteins:  $T_4$ -binding globulin (TBG),

Address reprint requests to: Prof. Daniel Glinier, University Hospital Saint-Pierre, Department of Internal Medicine, 322, Rue Haute, 1000-Brussels/Belgium.

albumin, and transthyretin (previously called prealbumin or TBPA) (4). The relative distribution of TH among the binding proteins is directly related to both their affinities and concentrations. In steady state conditions the bound hormone fraction is in equilibrium with a free unbound fraction, which represents a minute amount of the total circulating TH: 0.04% for  $T_4$  and 0.5% for  $T_3$  (5). Despite the fact that TBG in serum is by far the least abundant of the three transport proteins, about two thirds of the  $T_4$  in serum of normal subjects is carried by TBG, owing to its extremely high affinity for the hormone (6). In conditions with TBG excess, such as pregnancy, the proportion of circulating  $T_4$  carried by TBG is even greater, in excess of 75%, which indicates that TBG represents the major thyroid hormone transport protein in pregnancy (7). Furthermore, during pregnancy the respective affinities of the three binding proteins for their hormonal ligands are not significantly modified, and the circulating levels of both serum albumin and transthyretin remain stable, with only a slight tendency to decrease near the end of gestation, mainly as a result of passive hemodilution due to the increased vascular pool (8–10). Thus, the major change for thyroid hormone-binding proteins involves the marked and rapid increase in serum TBG levels as a result of estrogen stimulation. Compared with preconception concentrations (average 15–16 mg/liter), serum TBG begins to increase in pregnancy after a few weeks and reaches a plateau around midgestation, 2.5-fold higher than the initial value (between 30–40 mg/liter). Thereafter, the TBG concentration remains practically unchanged until term (Fig. 1) (11–13).

What are the mechanisms underlying the increase in serum TBG observed in conditions with estrogen excess? Earlier experimental animal studies, using both *in vitro* dispersed estrogen-exposed monkey hepatocytes and *in vivo* chronically estrogen-stimulated Rhesus monkeys, have shown that the increase in TBG observed in high estrogen conditions results from increased TBG production and release by the liver, where the protein is biosynthesized (14–16). In 1981, Gärtner *et al.* (17) demonstrated that native TBG, like many other serum glycoproteins, exhibited a molecular microheterogeneity caused by differences in the sialic acid content of the protein carbohydrate moieties (17). The microheterogeneity of TBG was shown, using isoelectric focusing, by separating four main bands with isoelectric point (pI) values between 4.25–4.55. The authors were also the first to report that, with TBG obtained from pregnant serum, the isoelectric focusing pattern showed a distinct anodal shift with more acidic bands (pI 4.15–4.17) corresponding to more heavily sialylated TBG, not seen with TBG from control subjects. A few years later, Refetoff and co-workers (18, 19) presented relevant information on the role of sialic acid terminal residues present on TBG's carbohydrate units in altering the stability and rate of removal of TBG from the bloodstream. Their studies showed that the survival of TBG in the circulation is dependent on its level of sialylation: TBG fractions with the highest sialylation levels are cleared from serum with a significantly longer half-life. However, these more heavily sialylated fractions represent only a small part of the total circulating TBG (~10–15%). Therefore, the net effect of kinetic changes due to highly sialylated estrogen-specific fractions on the global TBG clearance is relatively

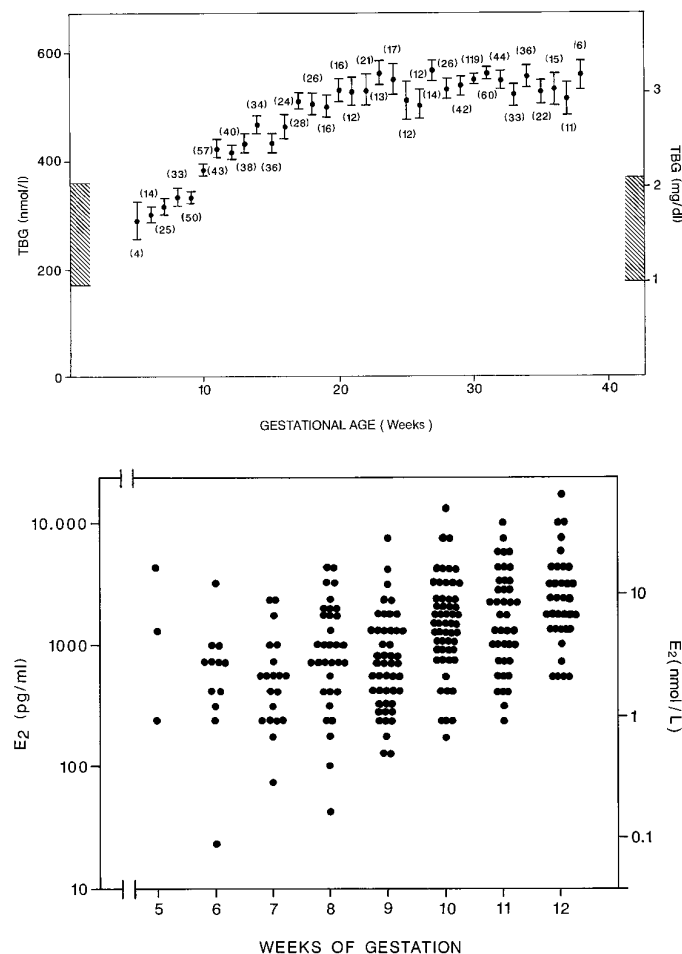

FIG. 1. *Upper graph*, Serum TBG changes as a function of gestational age. The data were obtained from individual serum TBG measurements in 585 euthyroid healthy women with normally progressing pregnancies (after exclusion of women who miscarried later on). Each point represents the mean  $\pm$  SEM of TBG determinations at weekly intervals in the cohort of pregnant women. There was a significant correlation between serum TBG and gestation time, from the 5th to the 20th gestational week ( $r = 0.60$ ;  $P < 0.001$ ). The reference range of serum TBG in nonpregnant subjects is 10–21 mg/liter. The numbers given in parentheses indicate the number of women for whom serum TBG determinations were available, for each time point shown on the graph. *Lower graph*, Serum  $E_2$  levels determined on a weekly basis in 246 normally progressing pregnancies, between the 5th and 12th week of gestation. Even though there was a significant correlation between serum  $E_2$  and gestation time ( $r = 0.40$ ;  $P < 0.001$ ), the figure illustrates the individual variability in the progression of  $E_2$  concentrations in the early stages of pregnancy. Between 5–12 weeks, 21.5% of  $E_2$  levels were below 500 ng/liter and 41.9% below 1,000 ng/liter. [Derived from (34).]

minor. Also, the work was carried out in a heterologous experimental system, where human TBG was injected into rats to perform the metabolic studies; this probably explains the authors' results of short TBG half-lives (~1 day), compared with the known physiological half-times of TBG determined in the Rhesus monkey (>4 days) and the human (>5 day) (15, 20, 21).

Thus, we infer from these data that a prolonged biological half-time *per se* cannot entirely account for the observation that, at least in primates, serum TBG starts to increase 24 h

after the exposure to high estrogen (15). Ain *et al.* (22) also attempted to demonstrate directly an effect of estrogen on the synthesis and secretion of TBG, using a human hepatoma cell line Hep G2, which produces TBG. The authors failed to show an increase in the cytoplasmic TBG mRNA content after estrogen exposure. It should be kept in mind, however, that Hep G2 cells are not an ideal model for the study of estrogen effects on TBG synthesis because these tumor cells do not react to estrogen stimulation as do normal cells (4). TBG could already be produced at its maximal rate or the cells could simply be unresponsive to estrogen. Hence, until the debate can be solved by more definitive and direct arguments, we consider it safe to propose that the increase in serum TBG found in pregnancy might result from a combination of factors: increased TBG production by liver, prolonged half-life due to increased sialylation, and stabilization of the TBG molecule because more  $T_4$  is proportionally bound to it.

Irrespective of the precise molecular mechanisms that may explain the TBG rise in pregnancy, it is important to note that the serum TBG increase observed during the first part of gestation does not follow a smooth curve. Determinations of TBG levels on a weekly basis in a large number of pregnancies indicates that the overall profile of the TBG rise in blood exhibits wide individual variation until the plateau is attained, and also that the plateau value is variable individually (Fig. 1). Such variation can be partially explained by the fact that preconception TBG levels are variable between 10–22 mg/liter (reference range in a normal female population) (23), but probably also because the effects induced by estrogen require that a certain threshold, estimated to correspond to  $E_2$  concentrations in the order of 500–1,000 ng/liter, be reached. Figure 1 indicates that serum  $E_2$  exhibits wide individual variation in the early stages of gestation, with the threshold range reached after as little as 6 weeks or as long as 12 weeks in healthy, normally progressing pregnancies. A final practical point to remember is that in women with inherited partial TBG deficiency, estrogen stimulation associated with pregnancy leads to variable modifications of TBG levels: no increase is observed in some women, while in others TBG is increased compared with preconception values, albeit to a much lesser extent than in women without congenital TBG aberration (24, 25).

## B. The thyroid hormones

**1. Total thyroid hormones.** In pregnancy, the alterations in total TH levels are the direct consequence of the marked increase in serum TBG: total  $T_4$  and  $T_3$  levels increase significantly during the first half of gestation. Levels of serum  $T_4$  rise sharply between 6 and 12 weeks, progress more slowly thereafter, and stabilize around midgestation; for serum  $T_3$ , the rise is more progressive (26). Both total  $T_4$  and  $T_3$  reach their plateau values by 20 weeks and are maintained until term. Because of the 20-fold greater affinity of TBG for  $T_4$  compared with  $T_3$ , changes in  $T_4$  levels follow the changes in TBG more closely. It can be expected therefore that the  $T_3/T_4$  molar ratio should remain essentially unaltered during pregnancy (27–29). Later in this review we will discuss the importance of an

increased  $T_3/T_4$  ratio, as an indicator of thyroidal alterations due to iodine deficiency during pregnancy.

These modifications represent the necessary adjustment from the “old” (preconception) steady state equilibrium to the “new” (gestational) equilibrium of the thyroidal economy. The changes are initiated by the progressive expansion of the TBG extracellular pool, which increases from ~2,700 to ~7,400 nmol over a trimester, accompanied by a major increase in hormone-binding capacity of the serum (8, 30). In the nonpregnant woman, approximately one third of circulating TBG carries a  $T_4$  molecule; *i.e.* the molar  $T_4$ /TBG ratio is 0.35–0.40. To ensure homeostasis of the free hormone concentrations during pregnancy, the extrathyroidal  $T_4$  pool must increase in parallel (31–33). The thyroidal adjustment therefore implies that, in the early stages of pregnancy, a transient period takes place, during which  $T_4$  and TBG concentrations are constantly changing.

This concept is fundamental to understanding the thyroidal alterations that are observed in pathological conditions such as iodine deficiency or hypothyroidism, characterized by the inability to achieve an adequate adjustment by the glandular machinery. Indeed, the adjustment of the thyroidal economy can be achieved only through a steady increase of  $T_4$  output by the gland during this period. To reach the new steady state, the hormonal output must steadily increase over a period of one trimester, with a constant daily enhancement over baseline  $T_4$  production values of 1–3% (34). When the new steady state has been reached, the overall production rate of TH should become similar to that prevailing before pregnancy (35).

How is the required thyroidal adjustment that takes place in the first trimester of gestation regulated? Because the rapid rise in the serum hormone-binding capacity due to increased serum TBG levels tends to induce a trend toward slightly decreased free hormone concentrations, the thyroidal adjustment is regulated primarily through the normal pituitary-thyroid feedback mechanisms, *i.e.* by TSH stimulation of the thyroid gland (Fig. 2). In healthy pregnant women, the “extra load” on the thyroidal machinery is relatively minor, and these physiological changes are unnoticeable: an increase in serum TSH is not commonly observed. On the contrary, as will be discussed later, in women with iodine deficiency or autoimmune thyroiditis and subclinical hypothyroidism, the TSH surge is amplified, and increases in serum TSH can be demonstrated, revealing the underlying mechanisms of adaptation (36).

**2. Free thyroid hormones.** Numerous publications have indicated that free hormone concentrations decrease during pregnancy; others, however, reported no change or even an increase. In earlier studies, these apparent contradictions could be partly explained by flaws in the methodologies employed for the determinations of both free  $T_4$  and  $T_3$ . For example, some techniques did not determine free  $T_4$  concentrations directly and required external calibration; others have been shown to be influenced by modifications occurring in the serum levels of TBG, albumin, and FFA associated with pregnancy; in still others, excessive dilution of serum in the test tube “stripped”  $T_4$  from TBG, producing an artifact (37–45). Figure 3 illustrates an interesting study by Roti *et al.*

ADJUSTMENT OF THYROIDAL ECONOMY IN RELATION WITH ELEVATED  $E_2$  LEVELS

FIG. 2. Schematic representation of the feedback regulatory mechanisms between the rise in TBG levels, the trend toward a reduction in free hormone concentrations, and the stimulation of the pituitary-thyroid axis. In the *right* part of the figure, data collected in 606 normal pregnancies in Brussels are illustrated, showing the progressive rise in serum TBG during the first part of gestation, accompanied by a progressive decrease in the free  $T_4$  index (saturation level of TBG by  $T_4$ ), and free  $T_4$  and  $T_3$  concentrations. Brussels being in an area with a restricted iodine intake, the quantitative reduction in free hormone concentrations observed in the second part of gestation is more pronounced than in areas without iodine deficiency. [Adapted with permission from D. Glinier (36) © Plenum Publishing Corp.]

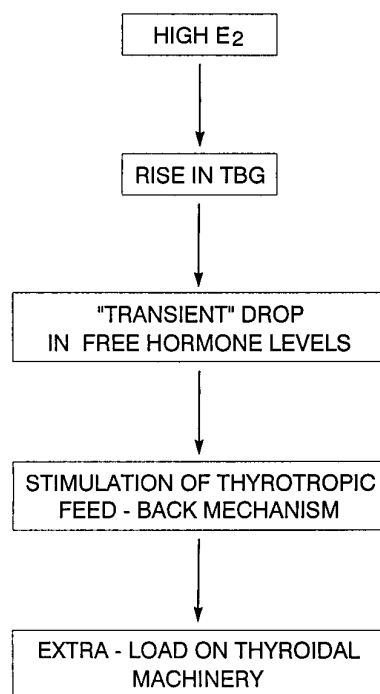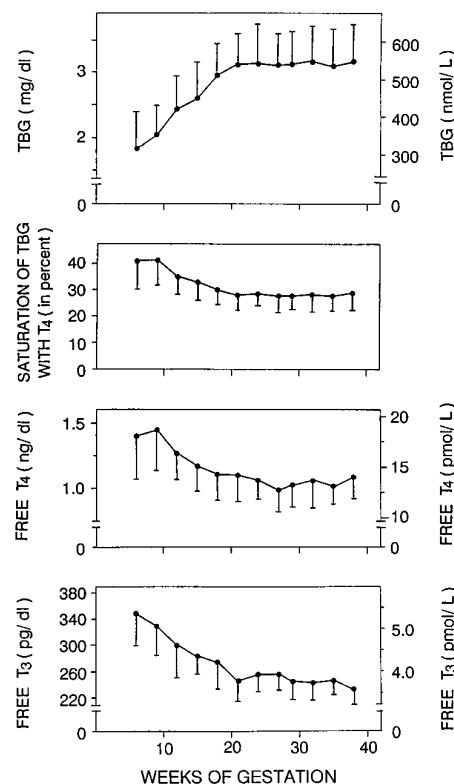

(46) in which the authors compared serum-free thyroid hormones in pregnant women at term and their newborns, using ten different commercially available kits. The data show the variability in free  $T_4$  and  $T_3$  concentrations obtained with different methods, but they also show that free hormone levels are always significantly lower than in nonpregnant women. Longitudinal studies based on reliable methodology (*i.e.* methods that are not influenced by changes in serum TBG and albumin levels) in large numbers of pregnant women without iodine deficiency have confirmed that serum free  $T_4$  levels are lower by an average of 10–15% at delivery, in comparison with nonpregnant female subjects. Changes in free  $T_3$  levels follow a parallel pattern. In most pregnant women, however, free hormone levels are maintained within the nonpregnant reference range (47, 48).

Women are considered to remain euthyroid during pregnancy, and the reason for the reduction (even though of small amplitude) in free hormone levels during the second half of gestation, observed in healthy women who have an adequate iodine supply, is not understood. The more drastic reduction in free hormone levels observed in women with iodine restriction and deficiency during pregnancy has a different meaning that will be discussed in detail later because it signifies true hypothyroxinemia (32, 34, 36, 49). The feedback mechanism through the hypothalamic-pituitary-thyroid axis is thought to function normally in pregnant women because pregnancy serum TSH levels remain similar to those of nonpregnant women when the iodine supply is adequate (50). However in our opinion, this matter is probably more com-

plex than usually considered. For instance, there are arguments to suggest that high estrogen levels over a prolonged period of time may modify the regulation of both basal and TRH-stimulated TSH release directly at the pituitary level (51–55). Also, as will be discussed later, high human CG levels down-regulate the TSH tone during early pregnancy. Finally, an apparent hypothyroid state might be compensated by an increased nuclear binding capacity for thyroid hormones in target cells (56).

The calculation of free  $T_4$  indices (which is still very much in use in many countries) deserves a comment: these indices are established on the basis of the known physico-chemical properties of the thyroid hormone transport proteins, using the  $T_4$ /TBG ratio or the  $T_3$  resin uptake test. One should remember that these estimations of free  $T_4$  concentrations from indirect calculations do not always provide reliable results in pregnancy. The free  $T_4$  index based on the  $T_3$  resin uptake test shows only small fluctuations in pregnancy, while the index based on the  $T_4$ /TBG ratio yields values significantly lower than those found in nonpregnant women (23, 57).

**3. Peripheral metabolism of thyroid hormones.** Three enzymes catalyze the deiodination of thyroid hormones in human tissues (58). Type I deiodinase, by outer ring deiodination of  $T_4$ , is responsible for the production of most of the circulating  $T_3$ . As already discussed, total  $T_3$  levels follow, albeit less tightly, the increase in total  $T_4$  associated with the rise in TBG during the first half of pregnancy. Furthermore, when the

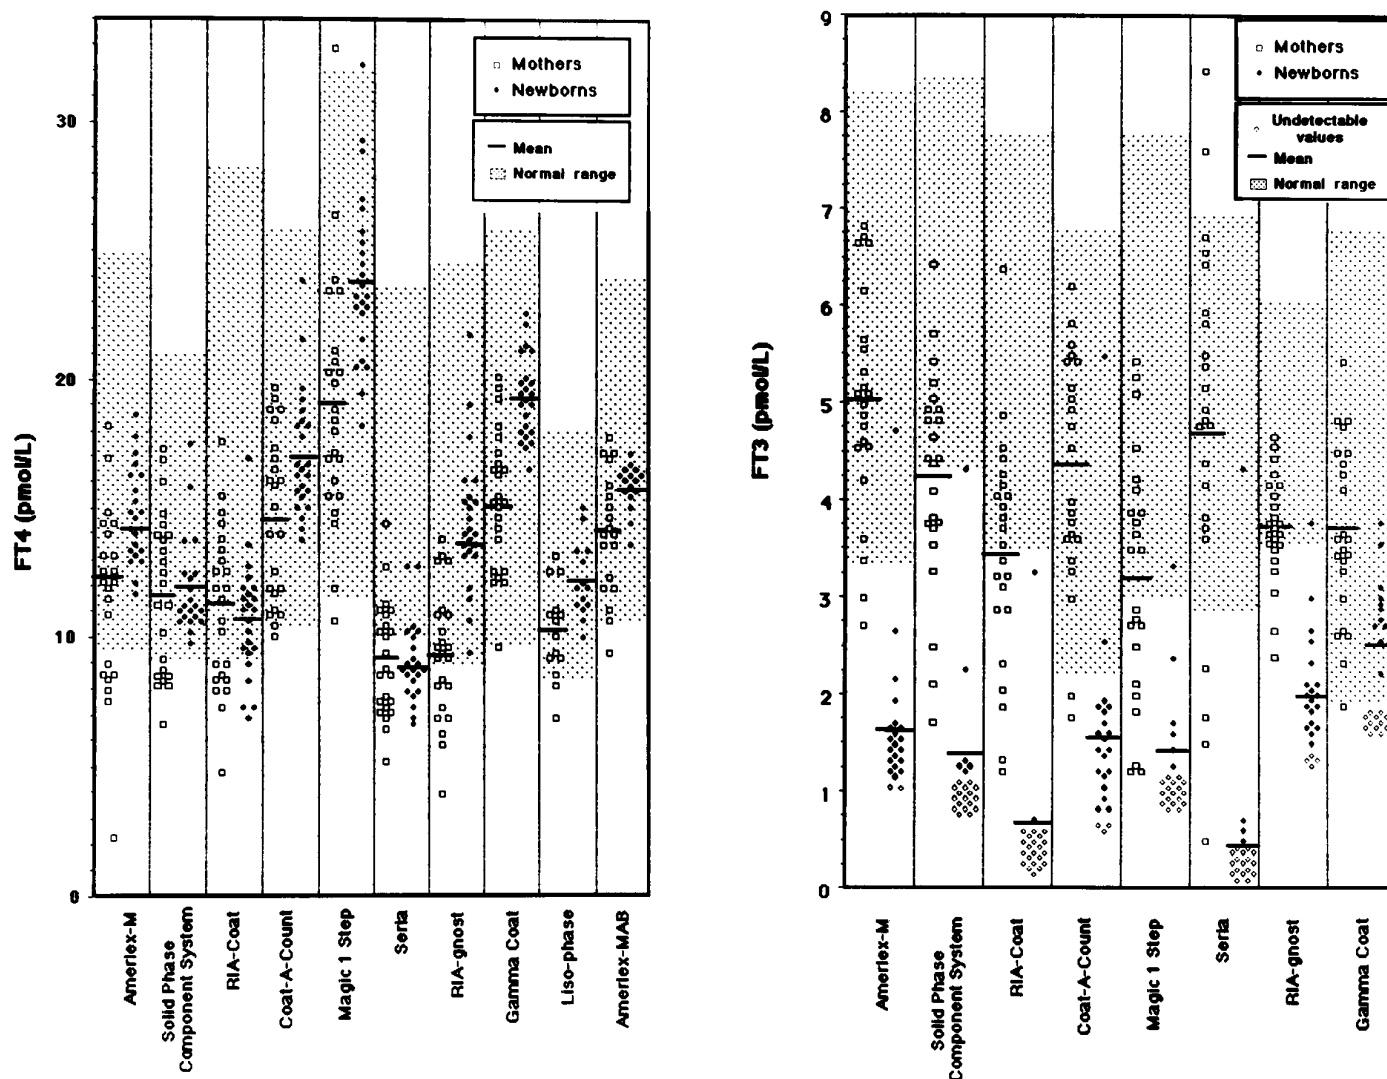

FIG. 3. Free  $T_4$  and  $T_3$  concentrations in at term pregnant women and their newborns, assessed by 10 (for free  $T_4$ ) and 8 (for free  $T_3$ ) commercially available kits. [Reproduced with permission from E. Roti *et al.*: *J Endocrinol Invest* 14:1-9, 1991 (46).]

thyroid gland is more stimulated (such as in iodine deficiency) during pregnancy, there is also preferential secretion of  $T_3$  by the gland, presumably under the direct influence of TSH. Concerning reverse  $T_3$  (formed by inner ring deiodination from  $T_4$  or  $T_4$  sulfate as substrates), maternal serum levels increase during pregnancy in proportion to the increase observed for total  $T_4$  (59, 60). Consequently, even though this has not been proven by direct evidence, there is no argument to propose that the activity of type I deiodinase should be altered in pregnant women. Type II deiodinase acts only on the outer ring and prefers  $T_4$  and reverse  $T_3$  as substrates. The enzyme is expressed in certain tissues (*i.e.* pituitary gland, brain, brown adipose tissue) and also in the placenta. Since the activity of type II deiodinase increases when the availability of  $T_4$  decreases, it has been proposed that type II deiodinase activity may represent a homeostatic mechanism for maintaining  $T_3$  production in the placenta when maternal  $T_4$  concentrations are reduced (*i.e.* during hypothyroidism or iodine deficiency) (61). The placenta also contains large amounts of type III deiodinase (62). This en-

zyme converts  $T_4$  to reverse  $T_3$  and  $T_3$  to  $T_2$ . Placental type III deiodinase, by its extremely high activity during fetal life, may explain the low  $T_3$  and high reverse  $T_3$  concentrations, characteristic of fetal thyroid hormone metabolism. The ontogeny of the three deiodinases in the developing fetus involves complex metabolic pathways that are beyond the scope of the present article. For detailed information, readers are referred to two excellent and extensive recent reviews on this important topic (50, 63).

Finally, elevated deiodination activity in the placenta probably plays an important role for the metabolism of maternal thyroid hormones. As was discussed earlier, the metabolic changes associated with the progression of gestation, in its first half, constitute a transient phase from a preconception steady state to a pregnancy steady state. The changes are accomplished through the gland's increased hormonal output to reach and remain at the new equilibrium. Once the latter has been reached, one would expect the hormonal needs to revert to their initial levels. For instance, the increased daily dose of L- $T_4$  necessary to maintain euthyroid-

ism in hypothyroid-treated pregnant patients should only be transient; however, clinical experience clearly indicates that it is not the case. If the increased L-T<sub>4</sub> dosage is not maintained in those patients during later stages of gestation, they rapidly become hypothyroid. This indicates that once the new steady state is reached, increased hormonal demands are maintained: this could be partially explained by factors such as transplacental passage of maternal hormones and increased turnover of T<sub>4</sub> of maternal origin, due to the high activity of placental type III deiodinase. To date, the quantitative importance of changes in the peripheral metabolism of maternal thyroid hormones and the exact role of the placenta in this mechanism have not been fully elucidated.

### C. The serum levels of thyroglobulin (TG)

Thyroglobulin is the protein matrix on which thyroid hormones are synthesized in the thyroid gland. Even though the TG molecule has no peripheral hormonal action, the serum levels of TG represent a sensitive, albeit nonspecific, indicator of the activity or stimulation state of the thyroid gland. Several studies have indicated that TG is frequently elevated during pregnancy: the increase in TG can be observed as early as the first trimester, but by later stages of gestation and particularly near term is significantly more pronounced (64–68). The alterations in serum TG associated with pregnancy were first considered to result from transient thyroïdal stimulation due to the thyrotropic action of human (h) CG at the end of the first trimester (69). This hypothesis is probably not correct because, as indicated above, TG changes occur mainly in the late stages of gestation (when hCG levels have decreased) and also because statistical correlation between the increments in TG and peak hCG levels is lacking (70).

Recently, TG changes in pregnancy have been investigated in greater detail. These studies have revealed that the increase in TG is correlated with other indices of thyroïdal stimulation, such as slight elevations in serum TSH (usually remaining within the normal range) and an increase in the T<sub>3</sub>/T<sub>4</sub> molar ratio, suggesting preferential T<sub>3</sub> secretion (34). Most importantly, changes in TG are also associated with an increase in thyroid volume (TV), and we have proposed that TG alterations may constitute a sensitive biochemical marker to monitor the goitrogenic stimulus frequently occurring during pregnancy in relation with iodine deficiency (71). In the Brussels area, where the iodine intake is only marginally low, between 50–100 µg/day, serum TG was found abnormally elevated in more than 50% of women at delivery with values ranging between 30 and 180 µg/liter, comparable to the TG values observed in conditions of severe glandular stimulation such as GD (Fig. 4).

### D. The metabolism of iodine

Dietary iodine after reduction to iodide is rapidly absorbed from the gut. Iodide derived from the diet and from peripheral catabolism of thyroid hormones and iodothyronines by deiodination constitutes the extrathyroïdal inorganic iodine pool. The pool is in dynamic equilibrium with two main organs, the thyroid gland and the kidneys. In normal subjects with a daily iodine intake of 150 µg, the

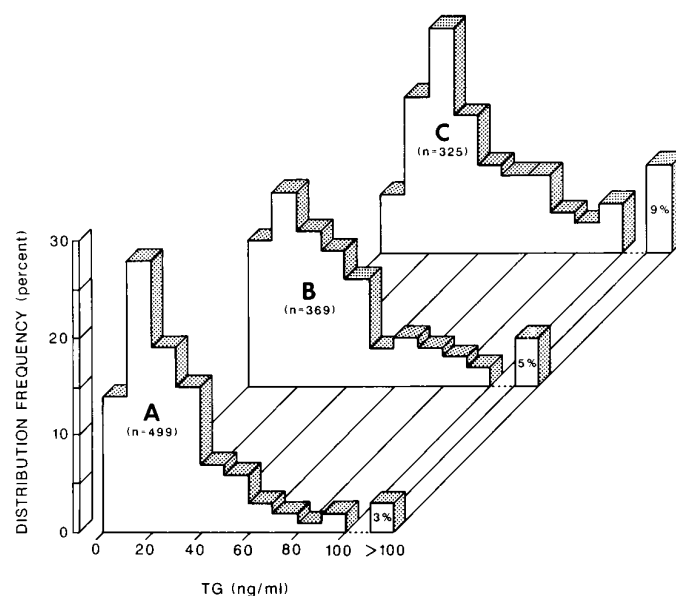

FIG. 4. Distribution frequency of serum TG levels determined at the initial evaluation before 16 weeks (A), during late gestation at 32–33 weeks (B), and immediately after delivery (C) in a cohort of 500 healthy pregnant women in Brussels. The number of determinations for each gestation period is shown in parentheses. In this assay for serum TG, the upper limit of the normal range for nonpregnant women was 30 µg/liter. [Reproduced with permission from D. Glinier *et al.*: *J Clin Endocrinol Metab* 71:276–287, 1990 (34). © The Endocrine Society.]

thyroid clearance rate for iodide is 10–25 ml/min (average 17 ml/min). The renal iodide clearance is 30 ml/min, resulting chiefly from glomerular filtration, with no evidence for tubular secretion or active transport.

In pregnancy, the renal clearance of iodide increases significantly because of an increased glomerular filtration rate. Renal hyperfiltration and increased clearance, observed for iodide and several other molecules (both smaller and larger) begins in the early weeks of gestation and persists until term, thereby constituting an obligatory renal iodine “leakage” (72–74). The iodide loss tends to lower the circulating levels of inorganic iodide and induces, in turn, a compensatory increase in thyroïdal iodide clearance, which reaches 60 ml/min and is accompanied by an absolute elevation of iodide entry into the gland (75, 76). These mechanisms indicate that the thyroïdal activity is increased during pregnancy, as has been suggested by early studies using radiolabeled iodine administered to pregnant women, as well as histological studies of thyroid follicular cells obtained during pregnancy and showing marked functional activity (77–79).

A second mechanism of iodine deprivation in the mother occurs later in gestation, from the passage of a part of the available iodine from the maternal circulation to the fetal-placental unit. At midgestation, the fetal thyroid gland has already started to produce thyroid hormones that are indispensable for adequate development of the fetus (80–82). Hence, when iodine deprivation exists during the first half of gestation, it tends to become more severe in the final stages. The extent of the iodine passage from mother to fetus is not precisely established. Another interesting and unresolved question is the role of the placenta in transferring

iodide: does it simply represent passive transfer or is there an "active pump" (83)? In the human the median urinary iodine excretion decreases by 10–15  $\mu\text{g}/\text{day}$  in the second half of gestation compared with the first half, perhaps representing the fraction of iodide transferred (34). Since this difference has not been confirmed by other studies, it remains an open question for future work (84).

In the nonpregnant condition an adequate iodine intake is estimated to be 100–150  $\mu\text{g}/\text{day}$ . Based on several studies, the consensus recommendation of the World Health Organization is that the iodine supply should be increased in pregnant and lactating women to at least 200  $\mu\text{g}/\text{day}$  (85, 86). For pregnant women who reside in countries with an iodine-sufficient environment with an intake often more than 150  $\mu\text{g}/\text{day}$ , the iodine losses in the urine and from transfer to the fetus are probably of little importance. Iodine deficiency disorders (IDD) do not present problems in the United States, Japan, or a limited number of countries in Europe (the Scandinavian countries, Switzerland, Austria), where national programs of dietary iodine supplementation have been in place for many years. In other areas of the world, however, IDD constitutes a serious public health issue (87). Available data indicate that 1 to 1.5 billion people are at risk of IDD. Among them, there are more than 500 million people who live in areas with overt iodine deficiency and a high prevalence of goiter.

Countries like Belgium, on the other hand, are representative of most European countries where systematic programs of dietary iodine supplementation have not been implemented and where the "natural" iodine supply is at, or below, the lower limit of adequacy. The average iodine intake in Belgium is below 100  $\mu\text{g}/\text{day}$  (88). Inasmuch as there is no endemic goiter in the population, this restricted level of iodine intake is presumably sufficient to cover the usual needs of thyroid hormone production in normal adult subjects, at least as long as nothing intervenes to disrupt the fragile equilibrium. Pregnancy therefore acts as an indicator of the underlying iodine restriction by its increased hormonal demands and obligatory iodine losses, and gestation results in a relative iodine-deficient state. In countries with a more severe iodine deficiency, the repercussions of iodine deprivation during pregnancy are obviously further enhanced (89).

#### *E. The hypothalamic-pituitary control of thyroid function and the role of hCG*

**1. Hypothalamic-pituitary-thyroid axis (HPTA).** We have already mentioned some arguments suggesting that elevated estrogen levels in pregnancy may influence the HPTA, perhaps by acting directly at different (and not yet clearly defined) levels in the thyroid gland feedback-regulatory mechanisms. In his 1993 review in *Endocrine Reviews*, Burrow (48) analyzed in detail the few available studies in which the HPTA has been assessed, either by the administration of  $T_4$  or  $T_3$  to pregnant women for short periods with the aim of evaluating the TSH responses to induced hormonal changes (75, 76, 90, 91) or after TRH administration (52, 92–94). Unfortunately these studies, performed before 1980, employed the then available assays which were unable to detect subtle

serum TSH changes. Overall, the conclusion drawn from this early work was that the responsiveness of the HPTA can be considered to function normally in pregnancy. If the above comments are interpreted with caution, we would certainly agree with Burrow's general conclusion (48).

**2. Regulation of serum TSH.** A correct interpretation of the modifications in serum TSH concentrations is crucial to correctly assess the alterations in pregnancy-associated thyroid function parameters. In earlier work, conflicting data have been reported: some authors found no change in serum TSH in pregnancy (95, 96), while others observed significant increases in TSH throughout gestation (93, 97). With the introduction 10 yr ago of sensitive immunoradiometric techniques allowing for extremely precise determinations of TSH levels within the normal range, new and important insights have been gained to better define the patterns of serum TSH changes during pregnancy.

In the present review, by examining different periods during gestation, we shall address two main questions related to serum TSH alterations. During the first trimester when hCG levels reach their peak, is there a transient fall in basal and TRH-stimulated TSH?; if so, to what is the TSH decrease related and what is its clinical relevance? During the second half of gestation, do TSH levels remain stable (*i.e.* comparable to before pregnancy and also to before the hCG peak) or are there subtle but significant modifications in serum TSH? If the latter is true, what is the meaning of TSH changes in late gestation?

**a. Transient fall in serum TSH in the first trimester.** The first observation of a transient fall in serum TSH during the second and third months of pregnancy in normal women was reported in 1976, and the authors at that time postulated that TSH suppression might be related to an intrinsic "TSH-like" activity of hCG. Unfortunately, with the "crude" techniques available, the authors could not show a reciprocal relationship between TSH and hCG levels in individual serum samples, and they concluded that "it was unlikely that hCG alone was responsible for the TSH suppression" (98). At that time, it was commonly believed that the placenta produced large amounts of various chorionic products, distinct from hCG, with thyroid-stimulating activity. Among those, human chorionic TSH (hCT) was a favorite and it was felt that hCT, alone or in concert with hCG, was responsible for the biological thyrotropic activity observed (99). A few years later, however, convincing evidence indicated that hCT was not a significant factor as a thyroid-stimulating agent and that peak hCG levels in normal pregnant women coincided with an important increase in the bioassayable thyroid-stimulating activity (100).

The basis for these early studies on thyroid stimulators of placental origin stemmed from the clinical observations in the 1970s of an association of hyperthyroidism with molar pregnancy (101–103). It has since been amply confirmed that in various pathological conditions, such as molar pregnancy (104, 105), other trophoblastic disease (choriocarcinoma) (106–109), and cancers of various origins (110–113), elevated hCG levels could induce hyperthyroidism, characterized by the rapid appearance of thyrotoxic symptoms and their even more rapid disappearance after the surgical removal of the

mole or cure of the tumor. Taken together, these observations have led to the concept that a substance secreted during pregnancy, and at particularly high levels in moles and choriocarcinomas, could be responsible for hyperthyroidism. Based on physico-chemical analyses of molar or tumor extracts, it was then shown that the thyroïdal stimulator most probably was hCG (114–116). It was also suggested that the thyroid-stimulating effects found in these pathological circumstances could be due not only to the extremely high circulating hCG levels, but perhaps also to the presence of molecular variants of hCG with particularly potent thyrotropic activity (117–119).

To date, there is a bulk of compelling evidence to indicate that there is indeed a transient fall in serum TSH near the end of the first trimester in normal pregnancy, and that this partial TSH suppression is associated with the elevation in circulating hCG. In 1985, Guillaume *et al.* (120) reported a significant blunting of the TSH response to TRH in six women who had higher hCG levels (64,000 IU/liter) at the end of first trimester, compared with 19 other pregnant women with a similar gestational age, in whom the TSH response to TRH was unaltered and hCG levels were comparatively lower (45,000 IU/liter). In 1988, Pekonen *et al.* (121) showed a negative correlation between hCG and TSH levels in a small group of pregnant women investigated immediately before and after abortion. These authors were the first to demonstrate clearly, at the level of the individual, a decrease in serum TSH associated with high hCG values. In our prospective studies on maternal thyroid function in pregnancy, the regulatory role of hCG was first investigated in a cohort of several hundred women in whom TSH and hCG levels were systematically determined between 8–14 weeks gestation (34). The results showed that a lowering in serum TSH was coincident with the peak hCG values (Fig. 5). The profiles of changes in serum TSH and hCG were clear mirror images, and there was a significant reciprocal correlation between TSH and hCG in individual samples. The results also indicated a linear relationship between hCG and free  $T_4$  concentrations during early gestation. Thus, the lowering of TSH corresponds to a transient and partial blunting of the pituitary-thyroid axis associated with an increased hormonal output by the thyroid gland. From these preliminary observations, we concluded that hCG is a thyroid regulator in normal pregnancy (3, 34). Similar conclusions were reached by Ballabio *et al.* (122), who proposed that hCG be considered “a putative physiological regulator” of maternal thyroid function in normal pregnancy.

The clinical relevance of these observations deserves a comment. First, it should be remembered that hCG behaves as a weak thyroid stimulator *in vivo*. We estimated that a 10,000 IU/liter increment in circulating hCG corresponds to a mean free  $T_4$  increment in serum of 0.6 pmol/liter (*i.e.* 0.1 ng/dl) and, in turn, to a lowering of serum TSH of 0.1 mU/liter. Hence, a transient increase in serum free  $T_4$  during the first trimester will only be observed when hCG levels reach or exceed 50,000–75,000 IU/liter. Second, for thyroid effects to be significant, such high hCG levels ought to be maintained for sufficiently long periods, but in general the hCG peak is maintained only briefly, lasting less than 1 week. Consequently in the majority of healthy pregnant women,

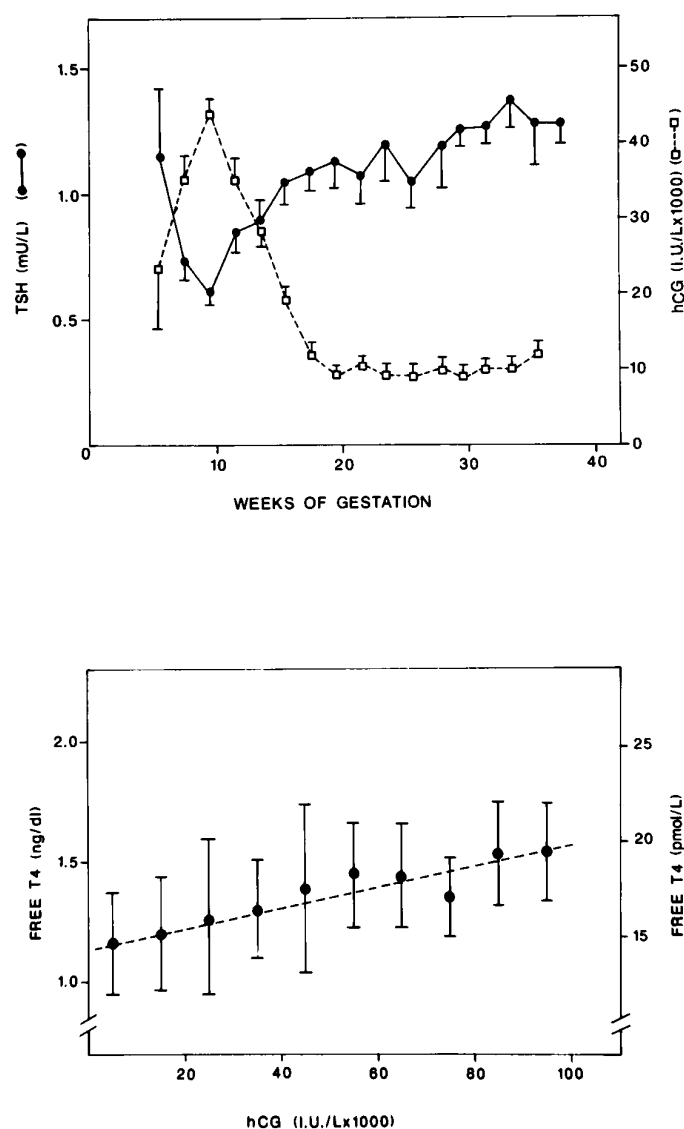

FIG. 5. Upper graph, Serum TSH and hCG as a function of gestational age in 606 healthy pregnant women. Between 8 and 14 weeks gestation, the changes in hCG and TSH levels are mirror images of each other, and there is a significant negative correlation between the individual TSH and hCG levels ( $P < 0.001$ ). Each point gives the mean value ( $\pm$  SE) of individual determinations pooled for 2 weeks. Lower graph, Scattergram of free  $T_4$  levels in relation to hCG concentrations in the first half of gestation. Each point represents the mean ( $\pm$  1 SD) free  $T_4$  values, determined between 6–20 weeks, plotted for 10,000 IU/liter increments in hCG. The dashed line indicates the linear regression curve ( $P < 0.001$ ). [Reproduced with permission from D. Glinioer *et al.*: *J Clin Endocrinol Metab* 71:276–287, 1990 (34). © The Endocrine Society.]

the stimulatory effects of hCG on the thyroid gland should be minor, of short duration, and not easily detected. Third, it is important from a clinical standpoint to assess how often partial TSH suppression may occur in early pregnancy. To address this question, we analyzed the prevalence of a TSH blunting (*i.e.* basal TSH levels below the lower limit of normality) in a large group of pregnant women during the successive trimesters of gestation (70). The results (Fig. 6) showed that in the first trimester, 18% of the women had a



| Trimester | N   | TSH (mU/L)           |                      | hCG (U/L) (mean $\pm$ SEM)       |                                | P      |
|-----------|-----|----------------------|----------------------|----------------------------------|--------------------------------|--------|
|           |     | $\leq 0.20$<br>N (%) | 0.21 - 4.00<br>N (%) | in women with<br>TSH $\leq 0.20$ | in women with<br>TSH 0.21-4.00 |        |
| I         | 338 | 62 (18%)*            | 276 (82%)            | 52,400 $\pm$ 3,900               | 34,900 $\pm$ 1,200             | <0.001 |
| II        | 249 | 13 (5%)              | 236 (95%)            | 20,400 $\pm$ 5,300               | 12,600 $\pm$ 1,000             | <0.001 |
| III       | 102 | 2 (2%)               | 100 (98%)            | ND                               | 13,000 $\pm$ 1,400             | ND     |

FIG. 6. Fractional distribution of normal or lowered serum TSH levels in normal pregnancy, in comparison with serum hCG concentrations. The total number of cases in each trimester (N) represents women investigated at initial presentation during the first, second, or third trimester. The percentage of cases with a lowered serum TSH (indicated in parentheses) is significantly greater in the first, as compared with second and third trimesters. ND, Not determined. [Adapted with permission from D. Glinioer *et al.*: *J Endocrinol Invest* 16:881-888, 1993 (70).]

TABLE 1. Serum TSH levels during pregnancy

| Trimesters        |                 |                 | Control values/comments      | First author, year (Reference)            |
|-------------------|-----------------|-----------------|------------------------------|-------------------------------------------|
| I                 | II              | III (or term)   |                              |                                           |
| 0.39 $\uparrow$   | 0.35 $\uparrow$ | 0.47 $\uparrow$ | 0.25 in postpartum           | Lemarchand-Beraud and Vannotti, 1969 (97) |
| 4.20              | 3.80            | 4.30            | No change; same as controls  | Fisher <i>et al.</i> , 1970 (95)          |
| 3.80 $\uparrow$   | 4.20 $\uparrow$ | 4.50 $\uparrow$ | 2.00 in nonpregnant controls | Kannan <i>et al.</i> , 1973 (93)          |
| 1.37 $\downarrow$ | 1.74            | 2.22            | 2.22 in nonpregnant controls | Braunstein and Hershman, 1976 (98)        |
| 0.83 $\downarrow$ | 1.35            | 1.47            | 0.80 in nonpregnant controls | Yamamoto <i>et al.</i> , 1979 (96)        |
| 2.82              | 2.84            | 3.03            | No change; same as controls  | Silva and Silva, 1981 (123)               |
| 1.80              | 2.20 $\uparrow$ | 2.60 $\uparrow$ | 1.80 in postpartum           | Weeke <i>et al.</i> , 1982 (124)          |
| 4.90              | 5.80            | 4.80            | No change; same as controls  | Smith and Bold, 1983 (125)                |
| 2.80              | 2.50            | 2.60            | ND                           | Gow <i>et al.</i> , 1985 (41)             |
| 1.30              | 1.60 $\uparrow$ | 2.10 $\uparrow$ | 0.91 before pregnancy        | Pacchiarotti <i>et al.</i> , 1986 (126)   |
| 2.00              | 2.00            | 2.50 $\uparrow$ | ND                           | Fung <i>et al.</i> , 1988 (127)           |
| 1.10              | 1.40 $\uparrow$ | 2.00 $\uparrow$ | ND                           | Price <i>et al.</i> , 1989 (128)          |
| 1.43 $\uparrow$   | 1.58 $\uparrow$ | 1.71 $\uparrow$ | 1.16 in postpartum           | Rodin <i>et al.</i> , 1989 (129)          |
| N.D.              | 1.25            | 1.25            | No change; same as controls  | Rasmussen <i>et al.</i> , 1989 (130)      |
| 0.75              | 1.09            | 2.08 $\uparrow$ | 1.00 6 months post partum    | Glinioer <i>et al.</i> , 1990 (34)        |
| 0.72 $\downarrow$ | 1.26            | 1.09            | 1.23 in postpartum           | Ballabio <i>et al.</i> , 1991 (122)       |
| 100%              | 110%            | 120% $\uparrow$ | In % of serum TSH at 17 wk   | Pedersen <i>et al.</i> , 1993 (131)       |
| 0.90 $\downarrow$ | 1.10            | 1.40            | 1.50 in nonpregnant controls | Berghout <i>et al.</i> , 1994 (132)       |

The values listed represent the mean (or median) TSH concentrations in each trimester and, when available, in the controls. Since actual numbers were not always readily available in all articles, they were recalculated from the data reported to the best possible approximation. The arrows illustrate the significant trends for serum TSH during pregnancy, as indicated by the authors in their publication. Irrespective of the TSH trends reported during pregnancy, the variability in mean TSH concentrations when comparing articles (particularly before 1989) is related to the wide variety of the TSH assays used. Articles are classified by chronological order. ND, Not determined.

transient subnormal serum TSH. Moreover in almost half of these cases, serum TSH was transiently undetectable ( $<0.05$  mU/liter). The lowering in serum TSH was still observed in 5% of the women during the second trimester. Women with a blunted TSH level ( $<0.20$  mU/liter) had a circulating hCG concentration significantly higher than in women with normal TSH levels. Confirming our previous estimates, women with a blunted TSH displayed, on average, hCG levels above 50,000 IU/liter. Among the 62 women with a transient suppression of TSH in the first trimester, seven (11%) had free  $T_4$  levels that were transiently increased above the upper limit of normality; among the latter, three women presented symptoms compatible with hyperthyroidism associated with significant vomiting. In this cohort, it should also be noted that nine women with a twin pregnancy were seen in the first trimester, with five of them having transiently undetectable serum TSH levels and two of five women exhibiting overt gestational thyrotoxicosis. Thus, some women may have sufficient thyroid stimulation to cause transient hyperthyroidism, as will be discussed in detail later (see Sections III.C.2 and III.C.3)

*b. Serum TSH in the second half of gestation.* The patterns of modifications in serum TSH levels in the second part of gestation have been the subject of longstanding controversy. In Table 1 we have collected the serum TSH values reported in 18 studies between 1969 and 1994, in which the authors have examined longitudinal changes in serum TSH according to the trimesters of pregnancy. A note of caution is worthwhile because of the inherent difficulties in the analysis and comparison of such data. First, the techniques employed for the determination of TSH in serum have obviously evolved tremendously in quality and precision over the span of 25 yr. Second, the number of pregnant women investigated in each study was extremely variable, from small numbers to large groups. Third, the actual TSH values were, in some cases, presented in a graph rather than being available directly in the articles; it was therefore necessary in some cases to recalculate the actual TSH values, as precisely as possible, from the original reports. Fourth, it was not always clearly stated whether the women investigated and presented as "normals," were actually normal. For instance, the presence of a goiter and/or thyroid antibodies was not systematically

evaluated, and most studies did not specify whether such women had been excluded from the reports. Finally and most importantly, in many of the studies no comments were made concerning iodine intake, and we can only infer from the authors' geographical locations whether the study was performed in an iodine-replete or -restricted area. Regardless of these inescapable limitations, the table still yields interesting information. First, nine of 18 studies clearly report an increase in serum TSH, within the normal range, near term. Second, the majority of studies that show serum TSH increases during late gestation originate from Europe: they can therefore be considered to have been performed in areas with a restricted iodine intake. In a few studies this question was addressed directly. More specifically, both the Belgian (34) and Danish (131) studies, which showed a systematic increase in serum TSH near term, were carried out in well defined areas with a marginal iodine deficiency. As will be discussed later, the same investigators also showed that iodine supplementation during pregnancy significantly prevented these alterations in serum TSH. Conversely, a Dutch study (132), which failed to show a difference in serum TSH between the third trimester and nonpregnant controls, was performed in an iodine-replete area.

We propose therefore that serum TSH, in normal pregnant women who have no evidence of thyroid autoimmunity and who reside in areas with a sufficient iodine supply, most probably remains stable and comparable to pregestational levels, after the transient fall due to high hCG in the first trimester. Conversely, when the iodine intake is restricted, an increase in serum TSH during late gestation (generally remaining within the reference range in normal pregnant women) reflects the stimulated thyroid state. Thus, iodine insufficiency is then revealed by pregnancy and explains the progressive increase in serum TSH observed after 16 weeks of gestation.

**3. Thyrotropic action of hCG.** The thyrotropic action of hCG is explained by the structural homology between the hCG and TSH molecules, and between LH/CG and TSH receptors. Thus, hCG is able to bind to the TSH receptor of thyroid follicular cells and exerts its stimulatory effects by activating intracellular messengers, such as cAMP (133).

*a. In vivo effects of hCG.* The role of hCG in regulating maternal thyroid function in the first trimester of pregnancy

has already been discussed. The thyroid gland of normal pregnant women may be stimulated by elevated circulating hCG levels to transiently secrete slightly more  $T_4$  and induce in turn a partial suppression of serum TSH. In up to one fifth of normal pregnancies, serum TSH may be transiently suppressed in the first trimester to values below the lower limit of normal.

An interesting question is whether it may be possible to distinguish, among normally progressing pregnancies, those women who are prone to blunt their serum TSH in the first trimester in response to the increase in circulating hCG. We approached this question in two clinical studies. In the first, the serum concentrations of intact hCG and its free  $\alpha$ - and  $\beta$ -subunits were measured in two groups of normal pregnant women from the same cohort, subdivided on the basis of whether or not they had a partially suppressed serum TSH (below 0.20 mU/liter) in the first trimester (Fig. 7). The results showed that a low serum TSH was associated with significantly higher levels of both intact hCG and free  $\beta$ -hCG subunit, whereas there was no significant difference in free  $\alpha$ -hCG subunit concentrations. Furthermore, in women with a low serum TSH and high hCG production, there was also a 20% increase in mean free  $T_4$  levels during the first trimester (70). The hCG-induced stimulatory effects on the maternal thyroid gland were transient inasmuch as the parameters of thyroid function were similar in both the initially low TSH and the normal TSH groups during the last trimester and at term. In the second study, our aim was to define more precisely the quantitative relationships between circulating hCG and thyroidal stimulation in the first trimester. The levels of hCG, TSH, and free  $T_4$  in early gestation were investigated in two groups of euthyroid women with single or twin pregnancies in whom the gestational age was precisely known because conception was obtained by *in vitro* fertilization techniques (Fig. 8). Results showed that peak hCG values in twin pregnancies were not only significantly higher than in single pregnancies (in fact, almost double), but also of much longer duration. Serum hCG values above 75,000 IU/liter lasted for less than 1 week in single pregnancy, while up to 6 weeks in twin pregnancy. Concerning the thyroidal repercussions, twin pregnancy was associated with a more profound and frequent lowering in serum TSH (blunted TSH values below 0.20 mU/liter were observed 3-fold more frequently). Also,

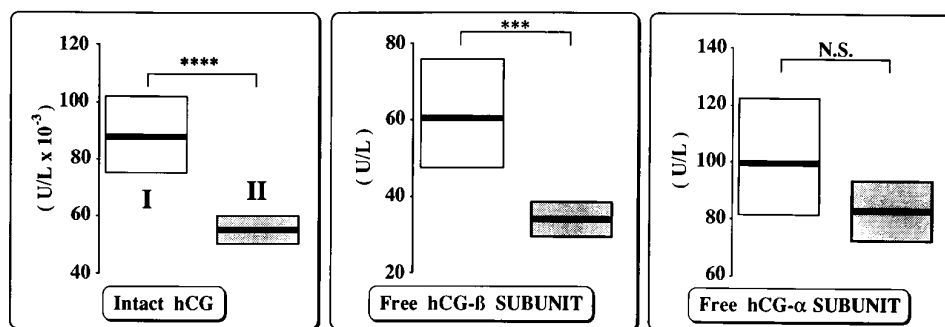

FIG. 7. Serum concentrations of intact hCG, and free  $\alpha$ - and  $\beta$ -hCG subunits in 62 women (group I; open bars) with blunted serum TSH (<0.20 mU/liter), compared with 338 women (group II; shaded bars) in whom serum TSH was between 0.21 to 4.00 mU/liter at the end of the first trimester. The results are given as mean values (represented by the thick horizontal lines)  $\pm$  95% confidence limits of the mean, calculated after log transformation of the data. Statistical analysis was carried out using one-way ANOVA (\*\*\*,  $P < 0.001$ ; \*\*\*\*,  $P < 0.0001$ ; NS, not significant). [Reproduced with permission from D. Glinier *et al.*: *J Endocrinol Invest* 16:881–888, 1993 (70).]

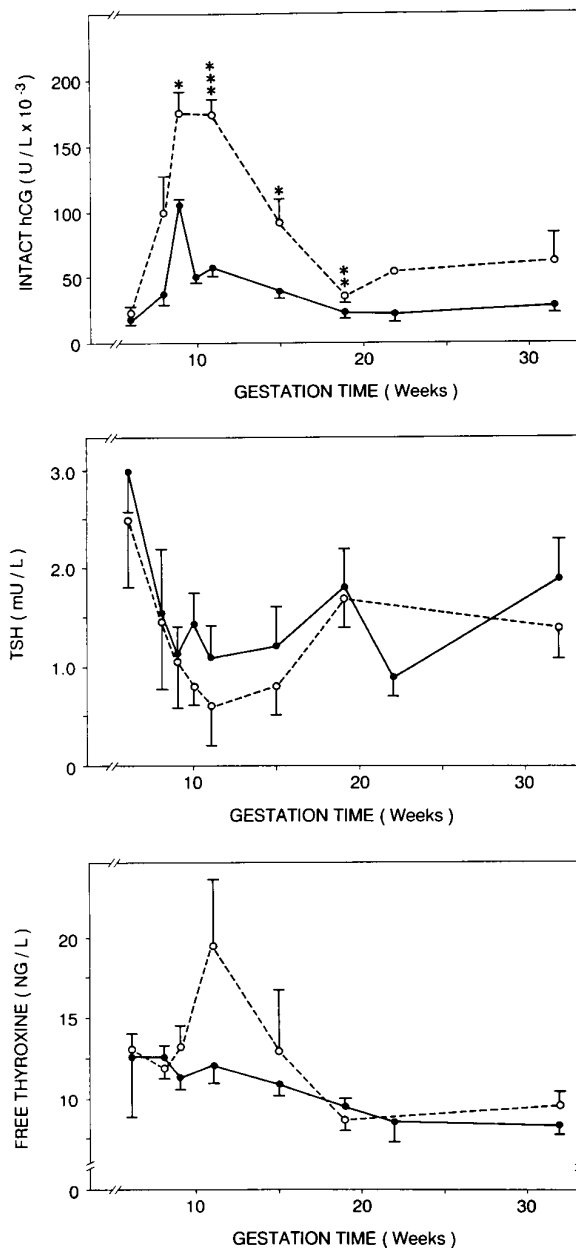

FIG. 8. Profiles of changes in heterodimeric intact hCG (upper graph), serum TSH (middle graph), and free  $T_4$  (lower graph) levels as a function of gestation time in women with single (●) ( $n = 17$ ) and twin (○) ( $n = 13$ ) pregnancies. Each point corresponds to the mean  $\pm$  SD of individual serum samples obtained at each gestational age. Statistical differences were calculated using the nonparametric Mann-Whitney rank test (\*,  $P < 0.05$ ; \*\*,  $P < 0.01$ ; \*\*\*,  $P < 0.001$ ). [Modified with permission from J. P. Grün *et al.*: *Clin Endocrinol (Oxf)*, in press (134). © Blackwell Science Ltd.]

free  $T_4$  values remained unchanged in single pregnancy while transiently rising in twin pregnancy (134).

Taken together these studies indicate that in normal pregnancy it is both the amplitude and duration of the hCG peak (*i.e.* the integrated exposure of the thyroid gland to hCG) that are responsible for the thyroidal stimulation and TSH suppression. Even though the production of a variant hCG molecule cannot be excluded, this hypothesis is not required to

explain the data. Finally, these studies show that thyroidal repercussions are generally absent when the hCG peak is of small amplitude and short duration. Thyroid effects may become manifest, however, in a few women in whom the thyroid gland is abnormally stimulated, with free  $T_4$  levels in the hyperthyroid range and suppressed serum TSH, sometimes accompanied by clinical manifestations of thyrotoxicosis (see Section III.C.2.).

*b. In vitro effects of hCG.* Highly purified hCG increases iodide uptake and cAMP production and induces growth in rat FRTL-5 thyroid cells (135–137). Recently, it has also been confirmed that purified hCG interacts *in vitro* with the human TSH receptor, thereby stimulating the human thyroid gland (138–140). Similarly, serum of pregnant women has been shown to exert a thyroid-stimulating activity *in vitro* (141). Thus, there is presently good evidence that the effects of hCG reported *in vivo* correspond to a TSH receptor-mediated thyroid-stimulating action *in vitro* (142).

TSH is a glycoprotein hormone composed of two subunits linked together to form the intact heterodimeric active molecule (143). The TSH receptor located on the surface of thyroid epithelial cells belongs to the family of receptors coupled to G proteins. The structure of the TSH receptor has been identified and consists of three domains, a long extracellular domain representing the N-terminal part of the molecule, a transmembrane-spanning domain of seven peptides joined by intra- and extracellular loops, and finally an intracellular C-terminal domain coupled to the G proteins complex (144, 145). To explain the thyrotropic effects of hCG, it is necessary to compare the structures of the hCG molecule with our present knowledge of the TSH molecule and its receptor. As in the case of TSH, hCG is also composed of two noncovalently linked subunits. The  $\alpha$ -subunit is common to all members of this family of hormones, whereas it is the  $\beta$ -subunit that confers its specificity to hCG (146, 147). There is a high structural homology between the  $\beta$ -subunits of hCG and TSH. As is the case for the hormones, there is also a considerable homology between the LH/hCG and TSH receptors (Fig. 9). The homology reaches 70% for the transmembrane-spanning domains and 45% for the extracellular domains of the receptors where the hormones bind (144, 148, 149). These molecular homologies are now part of a novel endocrine concept, referred to as "spill-over" syndromes (142).

In summary, thyroid-stimulating activity found in the serum of pregnant women is correlated with serum hCG levels and can be explained on the basis of molecular homologies between the hCG and TSH molecules as well as between the receptors for these hormones (Fig. 10). Human CG activates the same domain of the TSH receptor as does TSH by a spill-over mechanism related to molecular mimicry. It remains possible, *e.g.* in pathological (tumoral) conditions, that variant hCG molecules or metabolites of circulating hCG, exhibiting a more potent thyrotropic action, may play a role; until now, however, there has been no clear evidence that such variants or metabolites are involved in the hCG effects observed in normal pregnancy.

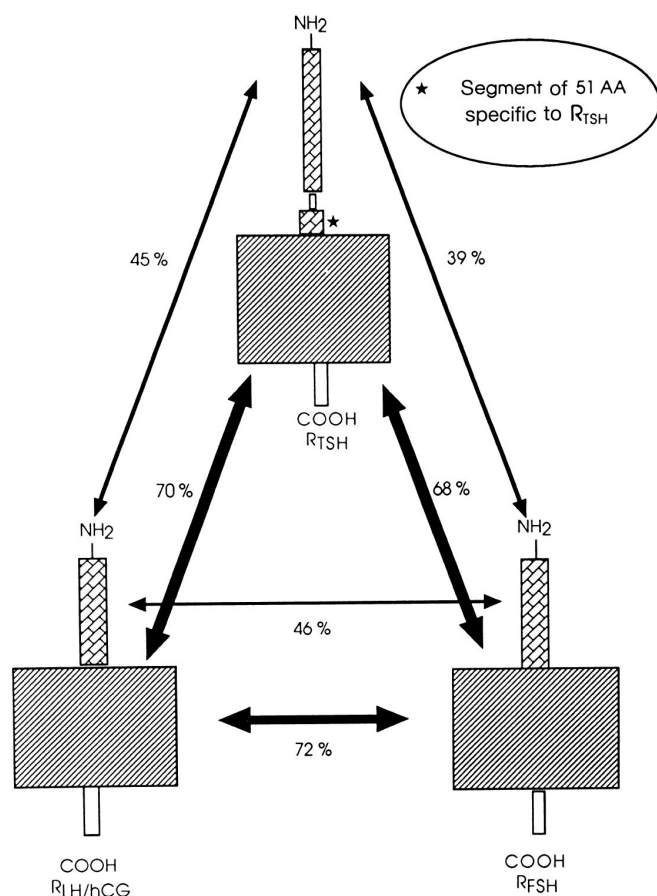

FIG. 9. The graph illustrates schematically the structure of the TSH, FSH, and LH-CG receptors, showing the homology of primary structures between the three receptors for these glycoprotein hormones. The similarities in peptide sequences (indicated as the percentage of homology) are shown by the *thin arrows* for the extracellular N-terminal regions, and the *thick arrows* for the intracellular C-terminal regions (including the transmembrane-spanning domains). [Adapted with permission from G. Vassart and J. E. Dumont: *Endocr Rev* 13:596–611, 1992 (144). © The Endocrine Society.]

#### F. A global view of thyroidal economy in pregnancy

During a normal pregnancy the changes in maternal thyroid function can be viewed globally as a balance between hormone requirements and the availability of iodine. The increase in hormone demands is due to three independent factors that concur to exert stimulatory effects on the thyroid machinery. The first factor is the adjustment of the thyroidal economy during the first trimester to the marked increase in the circulating levels of TBG, in response to increased estrogen production caused by hCG. The second factor is related to the thyrotropic action of hCG, also occurring in the first trimester, and which tends to transiently elevate free  $T_4$  levels and decrease serum TSH. Thus, hCG has two antagonistic effects on thyroid economy in early gestation, tending to lower free  $T_4$  after the rapid increase in serum TBG, and to increase free  $T_4$  through its specific thyroid-stimulating action. The third factor, which intervenes later in gestation, is related to modifications in the peripheral metabolism of the thyroid hormones, particularly at the placenta level. These events lead to the physiological adaptation of the thyroidal

economy when pregnancy occurs in healthy women in geographical areas with iodine sufficiency. A limited availability of iodine during gestation presents an additional challenge to the thyroid gland when hormone requirements are increased (Fig. 11). The same events underlie the pathological repercussions, in both mother and offspring, when pregnancy occurs in iodine-deficient areas (36, 49, 150, 151). These specific circumstances will be discussed in detail in the second part of this review.

### III. Pathological Alterations of Thyroidal Regulation Associated with Pregnancy

#### A. IDD

Iodine deficiency interferes with the capacity of the thyroid gland to meet the metabolic challenges presented by pregnancy, yielding important repercussions for both the maternal and fetal thyroid function. Whereas iodine sufficiency in countries such as the United States presumably explains the failure of US reports to confirm significant changes in thyroidal size associated with pregnancy (152), iodine restriction and deficiency, which are still present in many European regions, are responsible for the formation of gestational goiters, as well as glandular hyperplasia at birth in the newborn.

In Europe where, in the majority of countries, there is usually only a moderate iodine restriction, pregnancy in otherwise healthy women is often associated with goitrogenesis but rarely with hypothyroidism. In other regions of the globe, with a more severe iodine deficiency, however, both maternal and neonatal hypothyroidism is frequently encountered, endemic cretinism representing the most dramatic expression of these alterations.

**1. Consequences of iodine deficiency during pregnancy.** In most European countries, populations do not benefit from a systematic addition of iodine to the diet, and there is good and recent evidence that nutritional allowances for an adequate daily iodine intake, unanimously recommended by international agencies such as the United Nations International Children's Emergency Fund, International Council for the Control of Iodine Deficiency Disorders, and World Health Organization are far from being fulfilled: IDD persists and still constitutes a serious public health hazard (85–87). In regions with a marginally low iodine supply, it is particularly difficult to reach firm conclusions concerning the adequacy of iodine intake, mainly because important fluctuations occur in daily intake, both among individuals and also from one day to another. Measuring urinary iodine excretion levels reflects only the iodine intake of the most recent previous days. What really matters, however, is the long-term iodine balance, which determines the extent of intrathyroidal iodine stores. In populations with a chronically reduced iodine supply, it is the decreased availability of iodine that allows a better understanding of thyroidal alterations associated with pregnancy, because borderline iodine nutrition levels lead to increased thyroidal stimulation.

As a representative example of European countries, the average iodine intake in Belgium is limited to between 50–

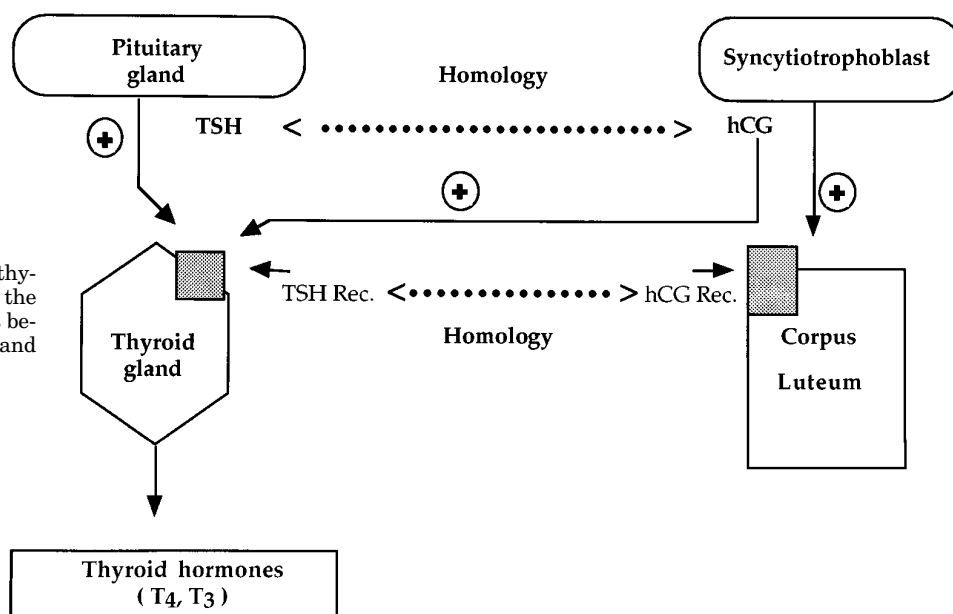

FIG. 10. Schematic representation of the thyroid-stimulating activity of hCG, based on the spill-over mechanism due to the homologies between both the TSH and hCG molecules and between the TSH and LH-CG receptors.

100  $\mu\text{g}/\text{day}$ . Figure 12 illustrates urinary iodine excretion levels determined in pregnant women without iodine supplementation from the Brussel's area, showing that 85% of them have iodine intakes clearly below the recommended amount. As a consequence, pregnancy acts to reveal the underlying iodine restriction, and gestation results in a state of increased relative iodine deficiency (153, 154).

In vast regions of the world outside Europe, iodine defi-

ciency is not only overt but is often severe, and in such areas the thyroid status of pregnant women and their offspring is frequently impaired. The degree of iodine deficiency is extremely severe in several areas of Central Africa and Asia for instance, with iodine intake levels below 25  $\mu\text{g}/\text{day}$ . Moreover, severe iodine deficiency is often associated with the presence of goitrogens in the diet (*e.g.* from Cassava-rich staple foodstuffs) as well as deficiencies in other trace ele-

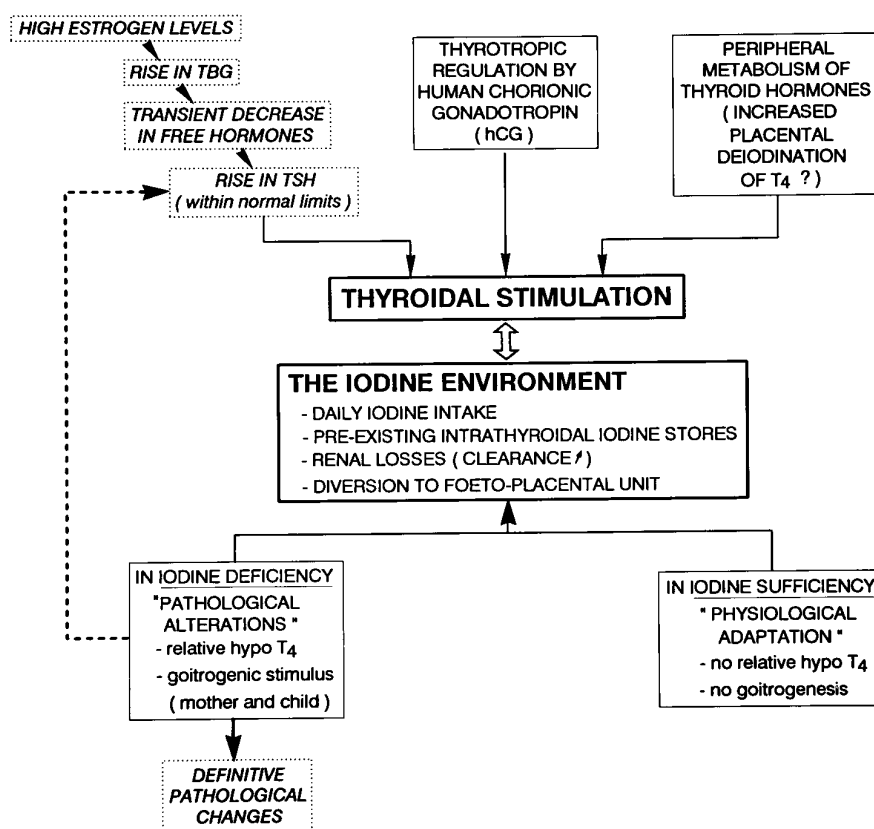

FIG. 11. From physiological adaptation to pathological alterations of the thyroidal economy during pregnancy. The figure illustrates the sequence of events occurring for the maternal thyroid gland, emphasizing the role of iodine deficiency to enhance the stimulation of the thyroidal machinery. [Reproduced with permission from D. Glinioer: *Thyroid Today* 18: 1-11, 1995 (150).]

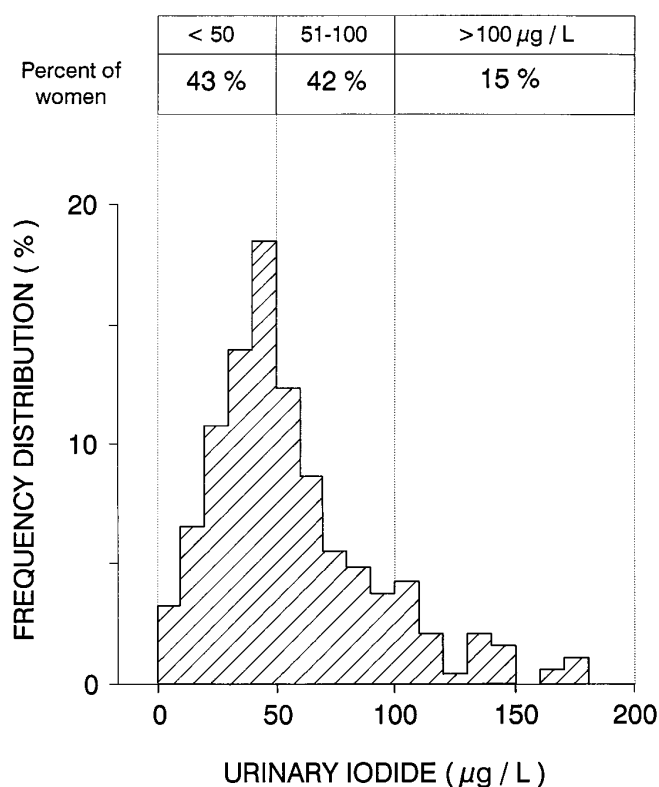

FIG. 12. Distribution frequency of urinary iodine concentrations during the first half of gestation (with a total of 334 urine samples assessed), in women in Brussels who did not receive iodine supplementation during pregnancy. The median urinary iodine concentration was 56 µg/liter. In the upper part of the graph, the population is classified as: 1) <50 µg/liter (severe deficiency); 51–100 µg/liter (moderate deficiency); and 101–200 µg/liter (no obvious iodine deficiency). [Reproduced with permission from D. Glinier (153). © Schattauer.]

ments such as selenium. These factors combined with iodine deficiency tend to enhance the thyroidal alterations (89, 155). Thyroid function, in adults and children in areas with severe IDD varies: some subjects exhibit normal thyroid function parameters and others display variable degrees of hypothyroidism. Also, hypothyroidism plays a major role in reducing a woman's fertility and increasing the rate of miscarriage. When hypothyroid women become pregnant, thyroid function tends to deteriorate even further as gestation progresses. Endemic goiter is the most visible hallmark of severe iodine deficiency in these populations: in some villages, the prevalence of goiter may exceed 60–70% of all adults. Longstanding goiters are usually multinodular, and field observations strongly suggest that goiter sizes often enlarge further during pregnancy. Thus, severe IDD justifies urgent iodination programs to eradicate endemic cretinism and hypothyroidism in women of childbearing age (156–159).

**2. Assessment of increased thyroidal stimulation.** Since the early 1990s, the concept was developed that increased thyroidal stimulation resulting from iodine restriction may lead to goiter formation during pregnancy. Hence, pregnancy should be regarded as an additional factor during a woman's life (an event that may obviously be repeated at short intervals) that may induce thyroidal pathology when iodine in-

take is marginally low. It is therefore important that clinicians correctly assess increased thyroidal stimulation (34, 160). In practice, four simple biochemical parameters have been identified and proven to be useful markers.

The first parameter is relative hypothyroxinemia. As already discussed, free  $T_4$  levels tend to decrease slightly, even in pregnant women who have an adequate iodine supply. In women with iodine restriction, however, the early rise in total  $T_4$  (associated with the rise in TBG) was shown to be inappropriately low, with free  $T_4$  and  $T_3$  levels progressively decreasing during the first part of gestation to stabilize at a low level (with an average decrement of 30%) in the second part of gestation (34, 131, 161). Under the environmental conditions that we investigated in Brussels before iodine supplementation was systematically introduced during pregnancy, it was observed that one third of pregnant women had free  $T_4$  values near or below the lower limit of normal (34). It was also shown that there was a tendency for individuals to exhibit variable patterns of glandular adaptation. For instance, a woman whose serum free  $T_4$  was already in the lower tertile of the population's range during early gestation had a greater than 80% risk of remaining in the lower part of the range during late gestation. Conversely, a woman with a serum free  $T_4$  in the upper part of the population's range during the last months of pregnancy had a greater than 90% chance of having a serum free  $T_4$  in the upper part of the range in early gestation, indicating that in this case thyroidal adaptation had taken place during the first trimester (32). That relative hypothyroxinemia was truly related to iodine restriction was confirmed by its partial correction when iodine supplementation was administered early enough during gestation (89, 123, 131).

The second parameter is preferential  $T_3$  secretion, reflected by an elevated molar ratio of total  $T_3/T_4$  in serum. It was mentioned previously that, owing to differences in the respective binding affinities of TBG for  $T_4$  and  $T_3$ , the  $T_3/T_4$  ratio tends to remain unchanged during pregnancy. Under conditions of a normal iodine intake, the serum  $T_3/T_4$  ratio ranges between 10–22 ( $\times 10^{-3}$ ) in euthyroid pregnant women (28, 59, 124, 162). In clinical and experimental conditions in which there is an increased stimulation of the thyroid gland, e.g. in GD (163) or after acute TSH stimulation (164), the  $T_3/T_4$  ratio increases as the result of preferential  $T_3$  production by the gland. The  $T_3/T_4$  ratio also depends upon the extent of iodine depletion (i.e. a small intrathyroidal iodine pool) and has been shown to be useful for evaluating the degree of thyroidal stimulation in endemic iodine deficiency (165).

In the pregnant women that we investigated in Brussels, the  $T_3/T_4$  ratio was significantly increased and remained elevated throughout gestation in women without iodine supplements, whereas the administration of iodine was accompanied by a lowering of the ratio. In our experience, however, iodine supplements given alone (from the 15th week of gestation onward) were not sufficient to normalize the  $T_3/T_4$  ratio, an indication that the intrathyroidal iodine pools remained relatively deprived, probably because the iodine supplements were used immediately for thyroid hormone production, rather than stored (166). It is also of interest to note that after parturition in untreated pregnancies, recovery

of normal thyroid function may take months: at 6 months postpartum the ratio of  $T_3/T_4$  was still elevated (167). These results suggest that the thyroidal alterations associated with pregnancy in iodine-restricted conditions not only persist after term, but may also have long lasting stimulatory effects on the thyroid gland, a consideration that may help explain why features of excessive glandular stimulation are frequently observed again in the same individuals in subsequent pregnancies, especially when the interval between pregnancies is brief.

The third parameter is related to changes in serum TSH. It was already mentioned that iodine restriction is associated with a significant increase in serum TSH after the first trimester. A progressive increase in serum TSH, until term, is observed in more than 80% of pregnancies under iodine-restricted conditions. Serum TSH changes usually remain within the normal range in women who are otherwise healthy. Albeit of relatively small amplitude, these modifications are statistically highly significant, with median TSH concentrations increasing from 0.75 mU/liter in the first trimester to 1.09 in the second, 1.28 in the third, and 2.08 mU/liter at term in Brussels (2, 34). Hence, serum TSH more than doubles during pregnancy when the iodine supply is limited, a clear indication of a sustained thyrotropic stimulation of the thyroid gland. At 6 months postpartum, it was observed that serum TSH levels had generally reverted to pregestational values (167). In comparison, in women who received iodine supplementation during pregnancy, the increment in serum TSH was markedly diminished by 50% or more at term (131, 166).

In areas with severe iodine deficiency such as in Ubungui (Republic of Zaïre), TSH modifications during pregnancy are not restricted to the normal range and are of a much greater amplitude. In such areas, maternal TSH values were found to exceed 100 mU/liter in some women at the time of delivery, confirming the intensity of chronic thyroidal stimulation (168). In comparison, pregnant women from the same villages, who received 1 ml of iodized oil in the second trimester of gestation, had significantly lower mean serum TSH values at delivery, never exceeding 20 mU/liter.

The fourth parameter is related to the changes in serum TG levels. It was already mentioned that serum TG is frequently elevated in pregnancy, particularly during the late stages of gestation near term (34, 68, 160, 169, 170). An illustration that thyroidal stimulation is associated with increased TG concentrations is given in Fig. 13. When we investigated pregnant women (selected because they displayed increased thyroidal stimulation), who were given or not given iodine supplements, a linear relationship was demonstrated between the increments in serum TG and TSH: without iodine supplementation, the relative increment in TSH reached 100% at term (compared with values in the first trimester) and was associated with a 60% relative TG increment. Conversely, with iodine supplementation, TG concentrations remained unchanged or even decreased. Moreover, in a group of pregnant women who received a combination treatment (iodine + L- $T_4$ ) during pregnancy, initially elevated TG levels not only decreased but normalized rapidly, in concomitance with a reduction in TSH concentrations (166).

Finally, it is important to mention that changes in serum

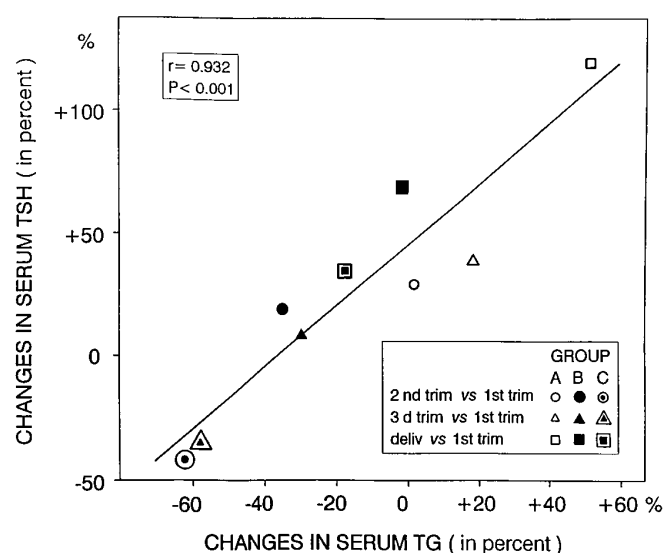

FIG. 13. Linear relationship between the relative changes (given as a percentage) in serum TG and TSH levels in three groups of women who participated in a randomized therapeutic trial during pregnancy: group A received no active treatment (placebo); group B received 100  $\mu$ g iodide/day; group C received a combination of 100  $\mu$ g iodide + 100  $\mu$ g L- $T_4$ /day. The results are presented as the comparison of increments or decrements in TSH and TG concentrations in the second and third trimesters, as compared with the values found in the first trimester before the initiation of treatment. [Adapted with permission from D. Glinioer *et al.*: *J Clin Endocrinol Metab* 80:258–269, 1995 (166). © The Endocrine Society.]

TG are correlated with goiter formation during pregnancy, indicating that TG determinations represent a useful marker to monitor gestational goitrogenesis associated with iodine deficiency.

In summary, relatively simple laboratory tools and standardized criteria can be used to assess excessive thyroidal stimulation, based on the routine determination of serum total  $T_4$  and  $T_3$ , free  $T_4$ , TSH, and TG levels. Better understanding of the complex mechanisms that intervene to regulate thyroid function during pregnancy and the deviations from physiological adaptation observed in iodine-deficient conditions may be very valuable in assessing the alterations of thyroidal economy associated with pregnancy and also in monitoring their therapy and prevention.

**3. Gestational goitrogenesis and its prevention by iodine supplementation.** Several investigations have been carried out in Europe in recent years to evaluate the modifications in TV associated with gestation. Together these studies have amply confirmed the original observations by Crooks *et al.* (171), who reported as early as 1967 (in those early days employing palpation) a striking difference in the incidence of goiter in pregnant women between Aberdeen, Scotland (area of lower iodine intake) and Reykjavik, Iceland (area of higher iodine intake) (171). The authors observed that the incidence of gestational goiter was 3-fold greater in Scotland compared with Iceland, and that it doubled during pregnancy in the lower, while remaining virtually unchanged in the higher, iodine area.

Table 2 summarizes seven recent European studies in which TV modifications associated with pregnancy have

TABLE 2. Modifications in thyroid volume (TV) during pregnancy

| n                | Women without iodine supplementation |                                   | Women with iodine supplementation |                                   | Study area |
|------------------|--------------------------------------|-----------------------------------|-----------------------------------|-----------------------------------|------------|
|                  | Average increment in TV              | Average iodine excretion in urine | Average increment in TV           | Average iodine excretion in urine |            |
| 21               | 10%                                  | ND <sup>a</sup>                   |                                   |                                   | Finland    |
| 20               | ~30%                                 | ND <sup>b</sup>                   |                                   |                                   | Denmark    |
| 66               | ~15% <sup>c</sup>                    | 170 µg/g creat.                   |                                   |                                   | Ireland    |
| 180              | 20%                                  | 45 µg/liter                       |                                   |                                   | Belgium    |
| 35               | 16%                                  | 30–55 µg/day                      | <5%                               | 100–150 µg/day                    | Italy      |
| 54               | 31%                                  | 50 µg/liter                       | 16%                               | 100–110 µg/liter                  | Denmark    |
| 120 <sup>d</sup> | 30%                                  | 40 µg/liter                       | 15%                               | 80–100 µg/liter                   | Belgium    |

<sup>a</sup> ND, Not determined, but considered adequate in Finland.

<sup>b</sup> ND, Not determined, but known to be moderately low in this area of Denmark, around 80 µg/day.

<sup>c</sup> Cross-sectional study with TV determined in different pregnant women, between first and third trimester.

<sup>d</sup> Study carried out in euthyroid women with increased thyroïdal stimulation (defined by an elevated serum TG, high T<sub>3</sub>/T<sub>4</sub> ratio and/or low normal free T<sub>4</sub> index, and normal serum TSH in the first trimester of gestation). [Reproduced with permission from D. Glinioer: *Clin Obstet Gynecol* 40:102–116, 1997 (49). © Lippincott-Raven Publishers.]

been evaluated precisely, employing thyroid ultrasonography. In Finland (172) and Ireland (84), where the iodine intake is considered adequate, the increment in TV was small, on average 10–15%: such changes are probably consistent with vascular swelling of the thyroid gland (“intumescence”) during pregnancy. In Belgium (34) and Denmark (130), areas with a restricted iodine intake, the increment in TV was greater, reaching 25% on average. From our work, it became evident that the size of the thyroid gland increases significantly when pregnant women are not supplemented with iodine: an increase in TV was observed in more than 80% of the women investigated and took place gradually with increasing gestation time. Even though the increment in TV, given as an average, may not seem spectacular, it is important to consider the wide individual variation in TV modifications, with many women exhibiting a doubling in TV at term (34, 49, 160). Moreover in our experience, almost 10% of the women developed a goiter during pregnancy (*i.e.* TV > 22 ml by ultrasonography), and volumetric changes in the gland were associated with clear biochemical evidence of increased thyroïdal stimulation, hence strongly suggesting that pregnancy truly induces goitrogenesis.

In three European studies (in Italy, Denmark, and Belgium), women were given iodine supplements, and changes in TV were compared between those with the treatment and matched controls (131, 166, 173). The results showed that iodine supplementation was accompanied by a significant increase in urinary iodine excretion levels and a marked reduction in goiter formation. From our data in Belgium, it was apparent that in most women the goitrogenic stimulus of pregnancy could be suppressed with iodine supplementation alone. It should be emphasized, however, that once thyroïdal stimulation is triggered, the iodine treatment may not always be sufficient to completely eradicate goitrogenesis, presumably because of the lag period required (approximately one trimester) to partially replenish low intrathyroïdal iodine stores. This difficulty probably explains the failure, reported by some authors, to prevent changes in TV, particularly when the study group includes patients who have a goiter before pregnancy (174). For the specific case of goitrous patients, it was shown that combining iodine supplementation with L-T<sub>4</sub> administration during gestation was

more efficacious in suppressing the goitrogenic stimulus and also reducing the size of the preexisting goiter (150, 151, 166).

Another important consideration concerns the long term evolution of gestational goiters. To investigate the reversibility of thyroïdal alterations after pregnancy, thyroid function parameters and TV were investigated 6 and 12 months after delivery in women who had initially been studied during pregnancy and who had not received iodine supplements (167). Six months after delivery, an overall normalization of thyroid function was noted, except for the T<sub>3</sub>/T<sub>4</sub> ratio, which tended to remain elevated, and also serum TG, which was still supranormal in a significant fraction of the cases. TV had only partially reverted to normal 12 months after delivery. More importantly, perhaps, in one half of the women who developed a goiter during pregnancy, the goiter persisted. These results indicated for the first time that thyroïdal alterations are not limited to the period of pregnancy. It allowed us to propose the concept that in conditions in which the iodine intake is only marginally reduced, pregnancy constitutes a risk for the maternal thyroid gland. Once formed, goiters tend to persist and therefore the glandular stress associated with pregnancy may provide a clue to understanding the higher prevalence of thyroid disorders in women. Other studies have confirmed the relationship between thyroïdal abnormalities and the occurrence of previous pregnancies (175, 176).

Taken together, these observations raise interesting questions concerning the precise role of “environmental” factors such as pregnancy in iodine-restricted conditions in the development of goiter, thyroid nodules, etc. Pregnancy certainly plays a significant pathogenic role, but other predisposing factors must intervene as well. Future studies are needed to delineate such predisposing factors and the ways to monitor and perhaps even treat preventively women who have the highest risk. In the meantime, recent observations on the thyroïdal responses associated with pregnancy have provided a strong argument in support of the view that the iodine supply should be increased during pregnancy and also after parturition (in particular in nursing mothers) for all women who reside in areas with a restricted iodine intake (86, 153, 177).

How much supplemental iodine must be given to prevent



gestational goitrogenesis remains debatable. Ultimately, it probably depends on the extent of the deficiency in preexisting intrathyroidal iodine stores. The goal is to restore and maintain an iodine balance; this goal can be reached in most women with 100–200  $\mu\text{g}$  iodine/day given as a supplement during pregnancy, at least in Europe. In regions with a more severe iodine deficiency, iodized oil (given intraperitoneally or by a single oral dose) has been shown to protect pregnant women from hypothyroidism for more than a year without significant side effects (159, 178–180).

**4. Consequences of iodine deficiency for the offspring.** The functional maturation of the fetal thyroid gland follows a well characterized pattern, with the thyroid acquiring the capacity to concentrate iodine and synthesize iodothyronines by 10–12 weeks, its secretory activity becoming effective by midgestation, and total  $T_4$  levels rising progressively until term (181, 182). Even though maternal and fetal thyroid functions are autonomously regulated, they are not independent of one another. There is evidence of at least some transplacental passage of maternal thyroid hormones, probably important in the early stages of fetal development. Moreover, the fetal thyroid activity depends entirely upon the availability of iodine transferred from the maternal circulation (183–187).

In conditions with only a moderate iodine deficiency, it was reported in 1992 that although the mothers exhibited relative hypothyroxinemia at delivery, this was not the case for the newborn who had total and free  $T_4$  concentrations significantly higher than their respective mothers, which would suggest that the fetus was protected from hypothyroxinemia (188). To achieve protection, and because of the very low intrathyroidal iodine stores in the fetus, the fetal thyroidal machinery is chronically subjected to an intense stimulation (189). In our observations with nonsupplemented mothers, neonatal thyroidal stimulation was reflected by significantly higher TSH and TG concentrations found in cord serum, compared with TSH and TG values in mothers at delivery. These initial studies clearly indicated that only a moderate reduction in the iodine supply was sufficient to constitute a stimulus for both the maternal and neonatal thyroid glands, with relative iodine deficiency representing the common regulatory link (188).

The apparent paradox between subnormal free  $T_4$  in the mothers at term and normal free  $T_4$  concentrations in the newborn can partially be explained by the fact that the fetal thyroid gland is hypersensitive to alterations induced by iodine restriction. In adults with intrathyroidal iodine stores in the order of 10–20 mg and daily needs of 100–200  $\mu\text{g}$  iodine, the turnover rate of used iodine is 1–2%/day. In the newborn, in contrast, intrathyroidal iodine stores are very low, representing, at most, 300  $\mu\text{g}$  when the iodine supply is sufficient, 50–100  $\mu\text{g}$  in Brussels, and as little as 25  $\mu\text{g}$  in severely iodine-deficient areas (190). Therefore, with daily needs of approximately 50  $\mu\text{g}$  iodine, the fetal gland turns over close to 100% of its stores to ensure the required daily hormone production, rendering both fetal and neonatal thyroid economies exquisitely sensitive to fluctuations in the iodine supply from the mother. Hyperthyrotropinemia at birth, before the occurrence of the neonatal TSH surge, re-

flects the increased fetal thyroidal stimulation. Also, this sensitivity explains why the recall rates after screening for congenital hypothyroidism by TSH determinations on the fifth day of life in Europe was shown to be inversely correlated to maternal iodine intake (87, 190).

The precise mechanism by which the fetus is protected against hypothyroxinemia remains presently unclear; in more severely iodine-deficient areas, however, this protective mechanism is overwhelmed, and the newborn clearly exhibits hypothyroidism. The endemias of Ubangui (northwestern part of Zaïre) and Ntcheu (central part of Malawi) have been extensively investigated by Thilly and co-workers (89, 168, 191). The authors showed that the frequency of severe hypothyroidism, evaluated at birth on the basis of a serum TSH concentration greater than 50 mU/liter, reached up to 25% in Ubangui and affected 7% of the newborn in Malawi. In Ubangui, they observed, in each village, groups of myxedematous cretins and cretinoid subjects exhibiting mental deficiency, neurological symptoms, severe dwarfism, etc. Extreme forms of fetal, neonatal, and juvenile hypothyroidism were less frequently encountered in Malawi, despite a similar degree of severity in the iodine deprivation. The data suggest that the pathogenic mechanisms leading to severe cretinism and hypothyroidism are multifactorial, the role of severe iodine deficiency being amplified by the deleterious effects of thyocyanate overload, selenium deficiency, and also glandular destruction and fibrosis occurring progressively during infancy (89). In contrast, when iodine supplementation is given to pregnant women in such areas, myxedematous cretinism can be eradicated and neonatal hypothyroidism prevented. As an example, Table 3 illustrates the results of a study (A. M. Ermans, unpublished results) in Kivu (Zaïre), in an area where iodine deficiency has previously been known to be extremely severe (167) and where iodine supplementation had recently been introduced. Upon the addition of adequate iodine supplements in the population, both maternal and neonatal thyroid function parameters became the same as the values found in untreated mothers and newborn, respectively, from the Brussels area, strongly showing that the problem had largely been corrected by simple measures (A. M. Ermans, personal communication).

Finally, in Europe, the effects of iodine supplementation

TABLE 3. Thyroid function parameters in mothers at delivery and in cord blood in Kivu (1992) and Brussels (1990)

|                                                     | Kivu <sup>a</sup> | Brussels <sup>b</sup> |
|-----------------------------------------------------|-------------------|-----------------------|
| <b>Mothers</b>                                      |                   |                       |
| Urinary iodine conc. ( $\mu\text{g}/\text{liter}$ ) | 62 <sup>c</sup>   | 55 <sup>c</sup>       |
| Total $T_4$ ( $\mu\text{g}/\text{dl}$ )             | 11.8 $\pm$ 3.2    | 11.0 $\pm$ 2.3        |
| Total $T_3$ (ng/dl)                                 | 154 $\pm$ 42      | 214 $\pm$ 38          |
| TSH (mU/liter)                                      | 1.9 <sup>c</sup>  | 1.9 <sup>c</sup>      |
| <b>Newborns</b>                                     |                   |                       |
| Total $T_4$ ( $\mu\text{g}/\text{dl}$ )             | 10.4 $\pm$ 2.8    | 11.8 $\pm$ 2.8        |
| Total $T_3$ (ng/dl)                                 | 44 $\pm$ 23       | 58 $\pm$ 24           |
| TSH (mU/liter)                                      | 6.2 <sup>c</sup>  | 6.0 <sup>c</sup>      |

<sup>a</sup> Data from Kivu are unpublished observations collected in 400 subjects and kindly authorized to be included by Prof. A. M. Ermans.

<sup>b</sup> From Refs. 34 and 188.

<sup>c</sup> Median values for urinary iodine and serum TSH. For total  $T_4$  and  $T_3$ , mean  $\pm$  SD are given.

during pregnancy on neonatal thyroid function parameters have been recently investigated in two prospective randomized studies in countries with a moderately low iodine intake in the population, below  $100 \mu\text{g/day}$  (131, 166). In the Danish study, 27/54 healthy euthyroid consecutive women were randomized during pregnancy to receive  $200 \mu\text{g}$  iodine/day, while the other half constituted the control group. In the Belgian study, 60/120 healthy euthyroid but selected pregnant women (exhibiting the biochemical criteria of increased thyroïdal stimulation discussed above) were randomized to receive  $100 \mu\text{g}$  iodide/day, while the other half constituted the control group. Parameters of thyroid function were evaluated in cord blood. Both studies yielded essentially comparable results: iodine supplementation did not significantly modify cord TSH levels, which on average were and remained below  $10 \text{ mU/liter}$ . In contrast, in both the Danish and Belgian studies, iodine supplementation resulted in a marked and highly significant decrease in cord TG concentrations, with mean decrements of 50% compared with the values observed in the newborn from placebo-treated control mothers. Furthermore, in Brussels, we also investigated the TV values, measured by ultrasonography in newborns during the first week of life (Fig. 14). When newborns from mothers with and without iodine supplementation during pregnancy were compared, the study showed an important result: TV was significantly larger at the time of birth in the neonates from nonsupplemented mothers and, moreover, glandular hyperplasia was already present in 10% of the newborns. In contrast, the newborn from supplemented mothers had, on average, a 39% smaller TV with no single occurrence of neonatal goiter formation. The data therefore strongly suggest that the process of fetal goitrogenesis occurs early during fetal development in conditions with a low iodine intake during pregnancy, perhaps as soon as the thyroid gland begins to develop. It remains to be elucidated, however (and this would require long-term investigations that are difficult to set up), whether the newborns who exhibited glandular hyperplasia since birth (or before) will become the cohort of children, then adolescents, and eventually adult subjects that we usually refer to as patients with "sporadic" euthyroid goiter.

In summary, when the iodine intake is marginally restricted or overtly deficient during pregnancy, the adequacy of thyroïdal physiological adaptation to the changes associated with pregnancy are not always achieved, and pathological alterations take place in parallel with the severity of chronic iodine deprivation, leading to increased thyroïdal stimulation. In the iodine nutrition conditions commonly encountered in Europe, pregnancy therefore acts to disclose the underlying iodine restriction, and gestation results in an iodine-deficient status, with maternal and neonatal goiter formation as the most visible consequence. Both maternal and neonatal alterations can easily be prevented by iodine supplementation given systematically during pregnancy. Finally, in severely iodine-deficient areas, iodine supplementation dramatically improves thyroid functions in both the mother and her infant and largely prevents the spectrum of iodine-deficient disorders.

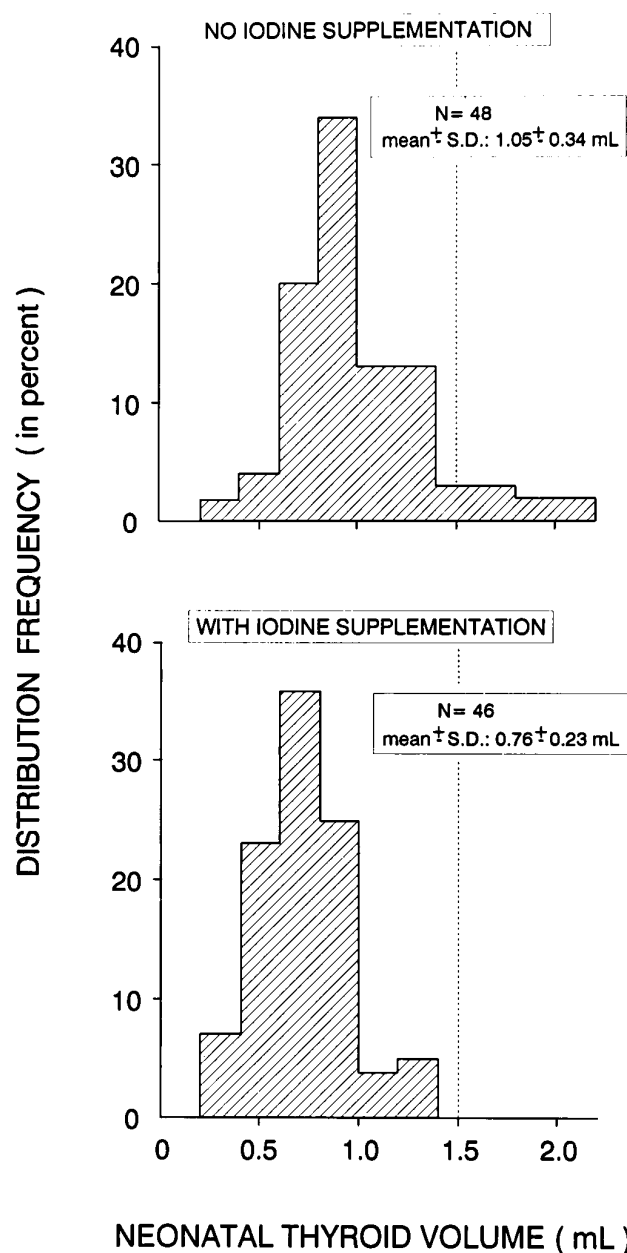

FIG. 14. Distribution frequency of TVs, determined by ultrasonography in 94 neonates born to mothers without iodine supplementation (upper graph) and with iodine supplementation ( $100 \mu\text{g/day}$ ) (lower graph) during pregnancy. TV was on average 38% larger in the newborns from untreated mothers, compared with the treated group. The dashed vertical line at 1.5 ml shows the upper limit of normality for TV in newborns in the Brussels' area. [Reproduced with permission from D. Glinioer: *Thyroid Int* 5:1-16, 1994 (151).]

#### B. Hypothyroidism and pregnancy

Over the past decade, important new information has accumulated in relation to primary thyroid insufficiency during pregnancy. In this part of the review, we shall attempt to summarize old and recent data, emphasizing the requirement for the modification of thyroid hormone therapy in women with established hypothyroidism, the importance of adequate detection of autoimmune thyroid disorders (AITD)

and subclinical hypothyroidism in early stages of gestation, and the association of reduced fertility and spontaneous abortion with thyroid dysfunction or positive thyroid antibodies.

*1. Fertility and pregnancy outcome in hypothyroid women.* There is a known association between hypothyroidism and decreased fertility which, in most cases, is associated primarily with ovulatory disturbances and not with abortion: women who require treatment with thyroid hormone have a 2-fold risk of primary ovulatory infertility (192). Observations in the human species are confirmed by animal investigations showing an association between experimentally induced hypothyroidism and menstrual cycle dysfunctions (193). Also, this association has a well known counterpart in the veterinary sciences. In areas with severe IDD, cattle (like humans) may exhibit various degrees of hypothyroidism, associated with a reduced fecundity. This problem has important consequences for the productivity of cattle raising and dairy farming and therefore constitutes a serious economic issue in some areas (194–196).

Hypothyroid women who become pregnant also carry an increased risk for obstetrical complications such as intra-uterine fetal demise, gestational hypertension, placental abruption, and poor perinatal outcome. There are indications that thyroid hormone administration greatly improves, although it does not entirely suppress, the frequency of these abnormalities (197–201). In general, infants of hypothyroid mothers appear healthy without evidence of thyroid dysfunction. In infants born to hypothyroid mothers, some studies have indicated the risk of a higher perinatal mortality and congenital malformations (not confirmed by other investigators), and there is also evidence for an increased frequency of low birth weight (199, 202–204) and a concern about potential long-lasting psychoneurological impairment in the progeny (205).

The most common cause of primary hypothyroidism in young women is chronic autoimmune thyroiditis, which occurs in both goitrous and atrophic forms. It is presently not clearly understood whether diminished fecundity and increased risk of poor pregnancy outcome, observed in hypothyroid women, result from thyroid insufficiency or instead reflect a more generalized autoimmune disturbance affecting both conception and fetal development (206).

*2. Thyroid hormone replacement in the hypothyroid pregnant woman.* Several recent reports have discussed thyroid hormone replacement during pregnancy in women with a previously established diagnosis of primary hypothyroidism. In the 1980s, the need for a systematic adjustment of the  $T_4$  replacement dose during pregnancy was not recognized, and it was actually stated (surprisingly enough still stated in the 1990s) that women with hypothyroidism rarely required a change in  $T_4$  replacement (207, 208). In fact at that time, only anecdotal reports described isolated clinical cases in which a pregnant woman became severely hypothyroid during gestation when her replacement dose was not adjusted; such cases were thought to represent exceptions, hence justifying publication (209). Newer studies have clearly shown that this is not the case (150). One plausible explanation is that before

the development of sensitive TSH assays that permit a more precise titration of  $T_4$  dosage, many patients with hypothyroidism were overtreated before becoming pregnant. Because the  $L-T_4$  overtreatment could not easily be detected with the less sensitive TSH assays, the need for an increased  $L-T_4$  requirement imposed by the metabolic changes associated with pregnancy was not recognized (210). In 1990, Mandel *et al.* retrospectively assessed  $L-T_4$  requirements before, during, and after pregnancy with the use of a sensitive TSH assay (211). The authors showed that all pregnant women on  $T_4$  replacement therapy exhibited an increase in serum TSH, and most also showed a decrease in serum free  $T_4$ , changes that indicated the need for increased doses of  $L-T_4$  (Fig. 15). In 1992, Kaplan (212) reported a retrospective analysis of thyroid hormone requirements in a group of 65 women, who were hypothyroid because of Hashimoto's thyroiditis or thyroid ablation for hyperthyroidism. Serum TSH rose markedly when  $L-T_4$  replacement doses were maintained at prepregnancy levels; the free  $T_4$  levels also decreased (on average of 40%) and became subnormal in 13% of the cases. In contrast, raising the daily  $L-T_4$  dosage by 40–100  $\mu\text{g}$  resulted in a reversion of TSH concentrations into the normal range (Fig. 15). After parturition,  $L-T_4$  requirements were approximately the same as before pregnancy.

Taken together, the results of recent work, in which thyroid function has been carefully investigated in pregnant women with established (and hence treated) hypothyroidism, mandate an increase in the daily dose of  $L-T_4$ , to avoid gestational hypothyroidism and its potential consequences (213–216). Based on these data and our own experience, the following consensus guidelines have been proposed (150). First, the daily dose of  $L-T_4$  should be increased in at least 80% of hypothyroid women. Pregnant women who do not require an increase in dosage were probably overtreated before pregnancy began. Second, an increased need for  $L-T_4$  is already apparent in the first trimester, concomitant with major changes in the thyroidal economy. Hence, adjustment of  $L-T_4$  dosage should be accomplished in the early stages of gestation. Third, individual increments in  $L-T_4$  dosage vary widely (between 10% and >100%), with a median dosage increment of 40–50% over the pregestational replacement requirement. Fourth, a regular clinical and laboratory follow-up is essential, with periodic determinations of TSH and free  $T_4$  concentrations, indicating the mandatory need for a close collaboration between the endocrinologist and the obstetrician.

*3. Subclinical hypothyroidism in pregnancy.* As already alluded to above, maternal hypothyroidism is considered uncommon or even rare in pregnancy because hypothyroid women are relatively less fertile (216–218). The frequency of established hypothyroidism in pregnancy is not clearly known, but conservative estimates suggest a prevalence of 0.3–0.7%, compared with 0.6–1.4% in the general population (219). In such women, if hypothyroidism has been diagnosed before gestation starts, appropriate measures to maintain euthyroidism can be implemented.

Perhaps as important (but more subtle) is undisclosed subclinical hypothyroidism in pregnant women. Three sets of studies have addressed this question and are of great value

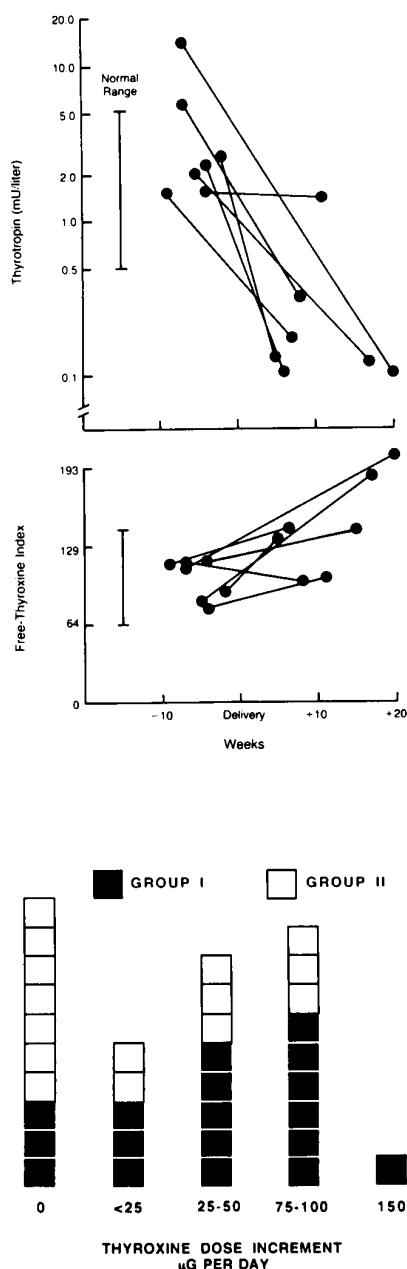

FIG. 15. *Upper graph*, Individual serum free  $T_4$  index and TSH concentration during the third trimester and postpartum in women with hypothyroidism. Results are shown for seven patients whose measurements were made 10 weeks before and 20 weeks after delivery. Each patient is represented by a single line. The normal ranges for serum TSH and free  $T_4$  index are indicated by the vertical bars. [Reprinted by permission of The New England Journal of Medicine, from S. J. Mandel *et al.*: Increased need for thyroxine during pregnancy in women with primary hypothyroidism. *N Engl J Med* 323: 91-96, 1990 (211). © 1990 Massachusetts Medical Society.] *Lower graph*, Increments in daily  $T_4$  dose required for a euthyroid state in women whose optimal doses were known before and during pregnancy. Each square represents one woman.  $T_4$  dose increments less than 25 µg/day were achieved by having the patient take one extra 100 µg or 150 µg  $T_4$  tablet each week. Group I represents women who were hypothyroid due to thyroid ablation (after radioiodine or total thyroidectomy); group II represents women who had documented hypothyroidism due to Hashimoto's disease. [Reproduced with permission from M. M. Kaplan: *Thyroid* 2:147-152, 1992 (212).]

to evaluate its clinical relevance. Subclinical hypothyroidism has been shown to occur more frequently in pregnant women with type I diabetes, who had normal serum TSH levels before conception (a significant proportion of them display thyroid antibody positivity) (220, 221). Also, Klein *et al.* (222) carried out a retrospective study on a serum data bank from 2,000 consecutive pregnant women in Maine at 15-18 weeks of gestation. The authors showed that 2.5% of all pregnant women had supranormal TSH concentrations (above 6 mU/liter), with one tenth of them exhibiting overt hypothyroidism. They also found that the prevalence of positive thyroid antibodies in women with subclinical hypothyroidism was 5-fold more frequent than in control pregnant women.

We have investigated prospectively the occurrence of previously undiagnosed subclinical hypothyroidism (150). Among 1,900 consecutive pregnant women who attended the prenatal clinic for the first visit between June 1990 and December 1992 and who were systematically screened by determining serum TSH concentrations and thyroid antibody positivity, 41 women had an elevation of serum TSH, thus yielding an overall prevalence of 2.2% (comparable to the 2.5% prevalence reported by Klein *et al.*). Serum TSH ranged between 4 and 20 mU/liter; in most instances, the TSH elevation was initially mild, below 10 mU/liter. Free  $T_4$  concentrations were not systematically subnormal but tended to cluster near the lower limits of normal. We considered these women as having "asymptomatic" subclinical hypothyroidism. In all women for whom a TRH test was carried out, the TSH response was markedly exaggerated (average increment in TSH:  $31 \pm 5$  mU/liter). These women were systematically given L- $T_4$  (50-125 µg/day) throughout gestation, a treatment that resulted in a clear-cut improvement in thyroid function parameters. In four patients, a spontaneous miscarriage occurred before the therapeutic intervention could be implemented (as will be discussed later, spontaneous miscarriage occurs with a greater frequency in such women). In 16 of the 41 women (40%), the cause of hypothyroidism clearly was related to thyroid autoimmunity, with thyroperoxidase antibody (TPO-Ab) titers between 400 and 5,000 U/ml. In the remainder, the etiology of hypothyroidism could not be determined in the absence of detectable antibody titers or a family history of goiter or hypothyroidism. Thyroid ultrasonography, however, when performed in these women, showed that one quarter of them had a reduced volume, below 7 ml, strongly suggesting thyroid hypotrophy.

Women with thyroid hypotrophy before pregnancy presumably have a sufficient functional reserve for the thyroid gland to function adequately before gestation (hence allowing them to become pregnant), but not after establishment of the pregnant state. An argument in favor of this hypothesis is our observation that, when monitored during the postpartum period, thyroid function reverted to normal despite withdrawal of L- $T_4$  (personal unpublished information). Thus, at least two population-based surveys, carried out in areas with different iodine intake, suggest a 2.5% overall prevalence of compensated or uncompensated hypothyroidism during pregnancy. Additional studies are warranted because many important questions remain unanswered. For instance, it is not known whether a mild decrease of maternal

thyroid function predisposes to an increased risk of obstetrical complications or impaired fetal brain development. Furthermore, there have been no follow-up studies of thyroid function in affected women after parturition or during subsequent pregnancies.

**4. Euthyroid autoimmune thyroid disorders (AITD) and pregnancy.** In a cohort study of pregnant women with mild underlying abnormalities published in 1991, it was noted that women who are euthyroid but carry thyroid antibodies at the onset of pregnancy have an increased risk of developing hypothyroidism during gestation (223). We therefore investigated more systematically the role of AITD on thyroid function during pregnancy (224). Among 1,660 consecutive pregnancies with no previous history of thyroid disorder, 87 women (5.2%) at the time of the initial visit showed the presence of thyroid antibodies, but their free  $T_4$  and TSH concentrations were in the normal range. No treatment was given and thyroid function parameters were monitored sequentially during gestation. Despite the expected decrease in the titers of thyroid antibodies during gestation, the parameters of thyroid function showed a gradual deterioration toward hypothyroidism in a significant fraction of the women. During the first trimester, the distribution curve of serum TSH levels shifted significantly to higher (but still normal) values when compared with normal pregnant controls from the same hospital. At the time of delivery, 40% of women with AITD had serum TSH greater than 3 mU/liter, with almost one half of them exceeding 4 mU/liter (Fig. 16). In the early stages of pregnancy, normal thyroid function was maintained due to the sustained thyrotropic stimulation. Three days after delivery, however, the serum free  $T_4$  concentration was significantly lower compared with controls. On the average, there was a 30% reduction in serum free  $T_4$ , with almost half of the cases in the hypothyroid range, confirming that such women have a reduced functional thyroidal reserve (225–227). It was also observed that thyroid autoimmunity was associated with obstetrical repercussions such as significantly increased rates of premature deliveries and spontaneous abortion (see below). Finally, it was possible at the individual level to predict progression to hypothyroidism on the basis of serum TSH levels and TPO-Ab titers in the first trimester. Hence, these parameters can be used to provide useful markers to identify those women who carry a higher risk and, therefore, initiate hormone substitution therapy.

It is beyond the scope of the present review to discuss all facets of thyroid autoimmunity and pregnancy, e.g. postpartum thyroiditis or the potential role of maternal thyroid autoimmunity on the risk of congenital hypothyroidism. To sum up, pregnant women with asymptomatic AITD carry a significant risk of developing hypothyroidism. Hypothyroidism results from the relative inability of the maternal thyroid gland to adjust to the changes associated with pregnancy. We, therefore, suggest that there may be a justification for proposing a systematic screening for antibodies in the early months of pregnancy, with the following rationale: 1) increased risk of spontaneous miscarriage; 2) risk of progressive hypothyroidism during gestation; 3) risk of postpartum thyroiditis after pregnancy; and 4) finally the well

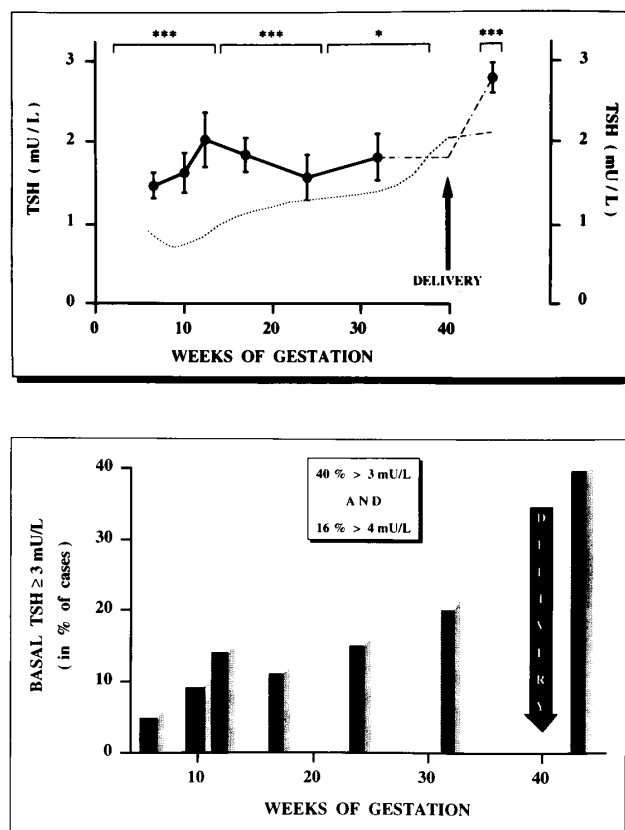

FIG. 16. Serum TSH in pregnant women with AITD. The upper panel shows the time course of basal TSH concentrations as a function of gestational time. Each point represents the mean ( $\pm$  SEM) TSH value at 6.5, 10, 12.4, 17, 24, and 32 weeks gestation. TSH was also measured 3 to 4 days after parturition. The solid line represents women with positive antibodies, and the dotted line indicates healthy subjects, investigated previously and shown as controls. Statistical differences between TSH values in AITD women and controls are indicated by the asterisks (\*,  $P < 0.05$ ; \*\*\*,  $P < 0.001$ ). In the lower panel, the bars show the proportion of AITD women in whom serum TSH was  $>3$  mU/liter, as a function of gestation time. The last bar shows TSH determinations obtained 3 to 4 days after delivery. [Reproduced with permission from D. Glinier *et al.*: *J Clin Endocrinol Metab* 79:197–204, 1994 (224). © The Endocrine Society.]

known long-term risk of developing definitive hypothyroidism later on in life (228). All pregnant women with AITD should be monitored closely and jointly by obstetricians and endocrinologists. Moreover, in view of the frequent occurrence of subclinical hypothyroidism and the potentially deleterious obstetrical repercussions of this diagnosis, we have proposed that women with AITD might benefit from  $L-T_4$  administration during pregnancy (150, 224). However, further randomized studies are needed to evaluate whether such treatment is truly beneficial.

**5. AITD and the risk of miscarriage.** Stagnaro-Green *et al.* in 1990 (229) and Glinier *et al.* in 1991 (223) were the first to report a strong correlation between positive thyroid antibodies and the risk of spontaneous miscarriage in women who were euthyroid. These results have since been confirmed by other reports, emphasizing the notion that the risk of miscarriage occurs primarily in the first trimester (230) and that women

with a history of consecutive abortions carry an even greater risk (231, 232) (see Table 4). Overall, the data presently available suggest that the relative risk of miscarriage is 2- to 4-fold greater in women with asymptomatic AITD, depending upon the criteria used to define spontaneous abortion and the selection of patients. The presence of thyroid immunity represents an independent marker of an at-risk pregnancy; the higher risk of miscarriage is thought to result from an abnormal stimulation of the immune system (206). It is also possible that mild degrees of thyroid insufficiency may explain, in part, the higher rate of fetal wastage. For instance, in the study of Stagnaro-Green *et al.* (229), the authors indicated that six of 17 thyroid antibody-positive women who miscarried had borderline high TSH levels. In our own studies, we were unable to confirm a statistical difference in TSH concentrations of women who miscarried, either with or without positive antibodies. This is perhaps not surprising, however, because most miscarriages occur in the first trimester, whereas the risk of subclinical hypothyroidism becomes more evident with increasing gestation time. Therefore, in our opinion, the relationship between subclinical thyroid dysfunction, thyroid autoimmunity, and obstetrical outcome needs further study (150).

C. Hyperthyroidism and pregnancy

The major cause of hyperthyroidism in women of child-bearing age is GD. Even though the frequency of the disorder is relatively low, occurring in only 0.5 to 2/1000 pregnancies, it constitutes an important clinical entity that has been the subject of several excellent reviews in recent years (for more detailed information see Refs. 35, 48, 202, 204, 216, 218, and 219). Therefore in this review, we elected to emphasize only a few key aspects of GD in pregnancy, dealing mainly with the follow-up and management of the disorder. The main focus of this section will dwell on another aspect of hyperthyroidism and pregnancy, characterized only recently, *i.e.* nonautoimmune gestational transient thyrotoxicosis (GTT) and its relationship with hyperemesis gravidarum.

1. *GD in the pregnant woman.* As a "condensé" of many references dealing with hyperthyroidism due to GD in pregnancy, and without attempting to be exhaustive, we propose the following general rules of "good clinical practice" for the disorder. First, when the diagnosis of GD has not been established before the start of pregnancy, the disorder is not always readily suspected clinically, mainly because the

symptoms and signs of mild to moderate hyperthyroidism may be mimicked by the hypermetabolic state of normal pregnancy (233). Attention should be given to a history of AITD in close family relatives, the presence of a goiter and/or suggestive eye signs, and a variety of clinical manifestations such as heat intolerance, warm and moist skin, tachycardia, wide pulse pressure, weight loss, and excessive vomiting in the early stages of gestation. Thyroid function should also be assessed in all patients with hyperemesis gravidarum. Accurate diagnosis of GD is important, because untreated hyperthyroidism is associated with increased fetal loss, with premature labor, and with low birth weight (234).

Second, the course of hyperthyroidism associated with GD generally tends to improve during pregnancy, for three independent reasons. Due to the immune suppression associated with the pregnancy state, there is a progressive decrease in the titers of thyroid-stimulating antibodies (TSAb), as gestation progresses. Furthermore, as discussed in the first part of this review, the increased hormone-binding capacity of the serum (due to the rise in TBG in the first trimester) tends to decrease the free fraction of thyroid hormones, and hence the free hormone concentrations. Finally, the reduced availability of iodine for the maternal thyroid may also help to improve the course of the disorder, at least when pregnancy occurs in women who reside in areas with a restricted iodine supply. It should be noted, however, that this usual "benevolent" evolution has exceptions, as we and others have witnessed extremely severe forms of hyperthyroidism due to GD in pregnant women. Also, transient exacerbations of hyperthyroidism near the end of the first trimester (associated with peak hCG) are not exceptional (235–237).

Third, concerning the management of patients with GD diagnosed during pregnancy, the general rules of treatment are well defined. Patients should be treated exclusively with antithyroid drugs (ATD), unless the severity of the condition justifies a more radical approach by surgery (which is then preferably carried out in the second trimester) (238–240). The optimal dosage of ATD should be maintained at a minimum, and the drugs withdrawn whenever possible, which is often the case after 4–6 months of gestation. One should not rely on L-T<sub>4</sub> administration to the mother to maintain euthyroidism in the fetus, since the transplacental passage of ATD is high, while it is negligible for thyroid hormones. Preference is usually given to propylthiouracil over methimazole (or carbimazole), although this choice is not mandatory, as long as the minimal dose rule of ATD is implemented (241–245). It is recommended that maternal free hormone concentrations be maintained in the upper third of the normal range, since it has been shown that such levels in maternal blood are associated with free hormone concentrations in the fetus that remain in the midrange of normal values (246–248).

Fourth, if hyperthyroidism is not adequately treated, fetal repercussions are observed with a significantly higher frequency (preeclampsia, premature labor, low birth weight, fetal and perinatal loss) (204, 249–251).

Fifth, it is strongly recommended that TSAb titers be assayed in early pregnancy and in the last trimester, because high TSAb levels predict the risk of neonatal hyperthyroidism and of recurrences of thyrotoxicosis during the postpartum period (235, 252–255).

TABLE 4. Thyroid antibodies and the risk of miscarriage

| % Miscarriage       |                  | Stat.             | Reference                          |
|---------------------|------------------|-------------------|------------------------------------|
| Positive antibodies | Control subjects |                   |                                    |
| 17%                 | 8%               | $P = 0.011$       | Stagnaro-Green <i>et al.</i> (229) |
| 13.3%               | 3.3%             | $P = 0.005$       | Glinoe <i>et al.</i> (223)         |
| 22%                 | 5%               | $P = 0.05$        | Lejeune <i>et al.</i> (230)        |
| 7%                  | 3.3%             | $0.05 < P < 0.10$ | Glinoe <i>et al.</i> (224)         |
| 62% <sup>a</sup>    | 14% <sup>a</sup> | $P = 0.003$       | Pratt <i>et al.</i> (231)          |
| 36% <sup>a</sup>    | 9% <sup>a</sup>  | $P = 0.03$        | Bussen and Steck (232)             |

<sup>a</sup> Women with a history of three (or more) consecutive first trimester abortions. [Modified with permission from D. Glinoe: *Thyroid Today* 18:1–11, 1995 (150).]

Sixth, women who require ATD treatment after parturition should be allowed to continue taking ATD, even during breast-feeding, as long as the daily doses required remain relatively small (up to 30 mg carbimazole or 150 mg propylthiouracil). It is recommended that the baby's serum TSH and free  $T_4$  be monitored every 2 to 4 weeks (256–258).

2. *GTT*. Gestational hyperthyroidism of nonautoimmune origin occurring in women with a normal pregnancy has recently been characterized (70, 104, 142, 150, 259–261). This form of hyperthyroidism differs from GD in that it occurs in women without a past history of GD and without detectable TSAb. Nonautoimmune hyperthyroidism is not always clinically apparent, since it is most often transient. Its etiology is directly related to the thyrotropic stimulation of the thyroid gland associated with hCG. The clinical importance of the disorder has probably been overlooked in the past. As an example, in a 1986 review article on “the thyroid gland and reproduction” for instance, GTT was not even mentioned as a plausible cause of hyperthyroidism in pregnancy (262). From recent studies, it is now thought that the prevalence of GTT may be as high as 2–3% of all pregnancies, if one accepts the concept that, due to its particular etiology, the clinical manifestations of the disorder will not always be apparent or easily detected (150).

To delineate more precisely the clinical relevance of GTT (defined as a biochemical pattern encompassing both subnormal, or undetectable, serum TSH with supranormal free  $T_4$  concentrations), we systematically screened 1900 consecutive pregnant women, at their initial visit, for the presence of a subnormal TSH ( $<0.20$  mU/liter) associated with a supranormal free  $T_4$  concentration ( $>26$  pmol/liter). Among the 40% of women who were tested between the 8th and 14th week of gestation, 18 women were diagnosed with GTT, yielding an overall prevalence of 2.4%. This figure may still be lower than the actual prevalence of the disorder because 60% of the women were screened either before (rarely) or after (more often) the period corresponding to peak hCG (150). Women with GTT were recalled and hCG levels determined 4–10 weeks after initial screening (Fig. 17). Despite the unavoidable delay associated with the recall process, when individual hCG concentrations were plotted as a function of gestation time and compared with the normal hCG profile, circulating hCG was abnormally elevated in every case diagnosed with GTT, with several women having a serum hCG greater than 100,000 U/liter. Serum hCG was determined again 5–13 weeks later in seven women, and it was observed that hCG levels clearly remained abnormally elevated for several weeks during the second trimester. Patients with GTT manifested free  $T_4$  concentrations in the thyrotoxic range, with a mean value of 33 pmol/liter (upper limit of normality: 26 pmol/liter).

From a clinical standpoint, symptoms compatible with hyperthyroidism, *i.e.* weight loss or an absence of weight increase, tachycardia, and fatigue, were present in half of the women. Hyperemesis was uniformly associated with the most severely thyrotoxic cases, and in three women, the symptoms were sufficiently alarming to require hospitalization for 1–2 weeks. Most women required no treatment with ATD and were given  $\beta$ -adrenergic blocking agents for a short

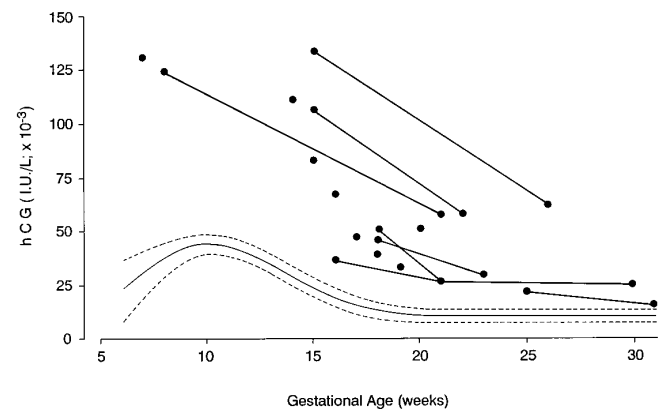

FIG. 17. Human CG levels in women with gestational transient thyrotoxicosis. The curve flanked by the dashed lines represents the mean with 95% confidence intervals as previously determined in normal pregnancy. Data for the control pregnancies was computed after log transformation of individual results, pooled for every 2 weeks of gestation. The individual points show serum hCG levels in women with GTT at the time of recall. In seven cases, hCG was determined again during follow-up at a later stage during gestation. [Reproduced with permission from D. Glinioer: *Thyroid Today* 18:1–11, 1995 (150).]

period (up to 2 months), with a noticeable improvement of symptoms; in a few women, we gave propylthiouracil for a few weeks because of the severity of the clinical presentation. In all cases, GTT was transient and the normalization of free  $T_4$  concentrations paralleled the decrease in hCG. GTT was not associated with a less favorable outcome of pregnancy. It is of interest that, while no women had detectable TSAb (and none developed GD in postpartum), the majority of women with GTT also had mild underlying thyroid abnormalities including moderately positive TPO-Ab titers or a micronodular or slightly enlarged thyroid gland, as assessed by ultrasonography.

Our results reinforce the concept that normal women may develop hyperthyroidism associated with abnormally elevated hCG levels, particularly when the hCG elevation is maintained for a prolonged period. The syndrome is not rare (at least 10-fold more frequent than hyperthyroidism due to GD) and is characterized by transient hyperthyroidism, with a blunted or suppressed TSH level in the first trimester and supranormal free  $T_4$  concentrations, and in most cases a marked and prolonged elevation in circulating hCG, which is thought to be responsible for the disorder. It occurs more frequently in women who have mild underlying thyroid abnormalities. The presence of a variant hCG molecule with a potent thyrotropic activity is possible and has been advocated by several authors (140, 260, 261), although this hypothesis is not absolutely required to explain the disorder. The cause of the anomaly in hCG regulation is presently unknown. Obstetricians should be aware of the disorder and monitor thyroid function and hCG levels in women with early gestational emesis.

3. *Hyperemesis gravidarum and hyperthyroidism*. Pregnant women often exhibit nausea and vomiting, particularly during the first trimester. These symptoms may represent a broad clinical spectrum, from the simple nausea of “morning sickness” to the nausea associated with mild vomiting, and finally to hyperemesis gravidarum, a serious complication

associated with weight loss and severe dehydration, often requiring hospitalization and drastic treatment (263–265). Exceptional cases have even been described with recurrent pregnancy-induced thyrotoxicosis presenting as hyperemesis gravidarum in successive pregnancies (266).

While some studies have suggested that usual morning sickness bears no causal relationship to abnormalities in thyroid function (267), biochemical hyperthyroidism is associated with hyperemesis gravidarum in most women with this condition (268–274). Several important studies have now clearly established a correlation between the intensity of emesis and abnormalities of thyroid function. In 1988, Mori *et al.* (275) compared three groups of pregnant women: those with no symptoms, those with nausea alone, and those with nausea and vomiting. The authors showed that during the first trimester, the severity of morning sickness correlates positively with serum free  $T_4$  and the concentration of plasma hCG and negatively with the level of serum TSH. In 1992, Goodwin *et al.* confirmed these relationships: they suggested that hCG plays a causal role in the hyperthyroidism of hyperemesis patients and that the severity of vomiting among controls and hyperemesis patients varies directly with hCG concentrations and the degree of thyroidal stimulation (259). The same group's experience of 67 hyperemesis patients indicates that the resolution of the hyperthyroidism varies widely, from 1 to 10 weeks, but the disorder is self-limited (204, 259, 276).

Thus, because there is no clear indication of increased vomiting among pregnant women with GD, hyperemesis in pregnancy appears to be significantly associated with hCG-induced thyrotoxicosis. Hyperemesis may be related to the high levels of hCG-induced estradiol in these women, hence providing the potential link between hCG, GTT, and the clinical finding of nausea and vomiting (142). As in the case of GTT without severe vomiting, it seems likely (or at least possible) that certain hCG fractions may be more important than the total hCG as thyroid stimulators (119, 122, 276). As stated by Mestman *et al.* (204): "Hyperthyroidism is a common, self-limited finding in hyperemesis gravidarum. The syndrome of transient hyperthyroidism associated with excessive vomiting should be considered in any woman presenting with biochemical evidence of thyroid function abnormalities suggestive of GTT in early pregnancy".

#### IV. Conclusions and Perspectives

Our concepts of the complex relationships between pregnancy and thyroid function have evolved importantly over the past several years. The demonstration that relative hypothyroxinemia and goitrogenesis occur in healthy women residing in geographical areas with a restricted iodine intake supports the concept that pregnancy is a potential goitrogenic stimulus and confirms that there is still a state of mild to moderate iodine deficiency in large parts of Europe. Concerning IDD, an effort has been undertaken in recent years to convince the official policy makers, at government levels, to implement iodine supplementation programs in the general population, and particularly in groups with a higher risk, such as children and pregnant women. Pregnancy-induced

goitrogenesis actually may constitute one crucial factor responsible, in part, for the so-called sporadic goiter in areas with a limited availability of iodine. Furthermore, relative iodine deficiency constitutes a stimulus not only for the mother's, but also for the newborn's thyroid gland. Because of the recently recognized transplacental passage of thyroid hormones, maternal hypothyroxinemia might have important implications for adequate fetal development.

By stimulating directly but transiently the maternal gland, hCG should now be considered a thyroid-regulating hormone in normal pregnancy. In addition, thyroidal stimulation associated with excess hCG activity may lead to gestational thyrotoxicosis in 2–3% of the pregnant population, a syndrome distinct from classic hyperthyroidism in pregnancy. More research is needed to understand better the regulation of hCG production and metabolism in women who present with GTT and hyperemesis gravidarum.

Undiagnosed subclinical hypothyroidism in pregnant women is probably more prevalent than usually considered. Moreover, pregnancy may precipitate symptomatic hypothyroidism in a significant fraction of women with previously asymptomatic AITD. More work is required to assess the relationships between the risk of spontaneous miscarriage and thyroid function disorders or autoimmunity.

Altogether, thyroid abnormalities, including goiter formation, transient hyperthyroidism, autoimmune thyroiditis, and subclinical hypothyroidism, affect 5 to 15% of pregnant women. Therefore, in our opinion, this justifies the systematic detection of these abnormalities by appropriate laboratory screening and by developing educational programs in this important area for gynecologists, family physicians, and endocrinologists.

Six years ago, when we published our first study on thyroid function during normal pregnancy (34), thyroid changes in pregnancy were generally considered to be minor and attributed only to the increase in TBG (1). We now realize that this assumption is far from the truth. Even though a wealth of new information has been gained in the last decade to improve our concepts of the physiology and pathology of the thyroid gland associated with the pregnant state, more knowledge most certainly needs to be acquired in the near future.

#### Acknowledgments

The author acknowledges the expert secretarial assistance of Mrs Cathy Coenen in the preparation of the manuscript. The author expresses his deep gratitude to the colleagues who have been closely associated with the "Brussels pregnancy project" from its start in 1988, mentioning in particular Philippe De Nayer, François Delange, Marc Lemone, and Sylvain Meuris. Without their friendly and constant insights and efforts, it would not have been possible to succeed. Finally, it was in the summer of 1987, during the annual meeting of the European Thyroid Association, on a rainy boat trip on the lake of Geneva, that I proposed for the first time in a discussion with my mentor and dear friend Dr. Jack Robbins (NIH, Bethesda, MD) my idea to carry out a study on the regulation of thyroid function in pregnancy. To "buckle the buckle," since he was the first to hear about our (then still vague!) project, it was normal that he also be the first to read the present text. I wish to express my deep gratitude to Dr. Jack Robbins, who undertook to critically review and proofread the manuscript; Jack was a tremendous help in improving its content and presentation.



## References

- Burrow GN 1990 Editorial: thyroid status in normal pregnancy. *J Clin Endocrinol Metab* 71:274–275
- Glinoe D, De Nayer P 1993 Thyroid and its diseases in pregnancy. In: Monaco F, Satta MA, Shapiro B, Troncone L (eds) *Thyroid Diseases: Clinical Fundamentals and Therapy*. CRC Press, Boca Raton, FL, pp 517–527
- Glinoe D, De Nayer P, Delange F 1992 Fonction thyroïdienne et grossesse. In: Leclerc J, Orgiazzi J, Rousset B, Schlienger J-L, Wehmeau J-L (eds) *La Thyroïde: de la Physiologie Cellulaire aux Dysfonctions: ed 7. JB Lippincott, Philadelphie*, pp 96–111
- Bartalena L 1990 Recent achievements in studies on thyroid hormone binding proteins. *Endocr Rev* 11:47–64
- Robbins J 1992 Thyroxine transport and the free hormone hypothesis. *Endocrinology* 131:546–547
- Robbins J 1996 Thyroid hormone transport proteins and the physiology of hormone binding. In: Braverman LE, Utiger RD (eds) *The Thyroid*, ed 7. JB Lippincott, Philadelphia, pp 96–111
- Robbins J, Cheng S-Y, Gershengorn M, Glinoe D, Cahnmann HJ, Edelhoch H 1978 Thyroxine transport proteins of plasma: molecular properties and biosynthesis. *Recent Prog Horm Res* 34:477–519
- Robbins J, Nelson JH 1958 Thyroxine-binding by serum proteins in pregnancy and in the newborn. *J Clin Invest* 37:153–159
- Mulaisho C, Utiger RD 1977 Serum thyroxine-binding globulin: determination by competitive ligand-binding assay in thyroid disease and pregnancy. *Acta Endocrinol (Copenh)* 85:314–324
- Hassan MA, Miller NJ, Hamdi IM, El-Adawi SA, Al-Zaid M, Al-Awqati A 1991 Consideration on some hormone binding proteins patterns during pregnancy. *Horm Metab Res* 23:85–87
- Laurell C-B, Rannevik G 1979 A comparison of plasma protein changes induced by danazol, pregnancy, and estrogens. *J Clin Endocrinol Metab* 49:719–725
- Skjöldebrand L, Brundin J, Carlström A, Pettersson T 1982 Thyroid associated components in serum during normal pregnancy. *Acta Endocrinol (Copenh)* 100:504–511
- Sparre LS, Brundin J, Carlström K, Carlström A 1987 Oestrogen and thyroxine-binding globulin levels in early normal pregnancy. *Acta Endocrinol (Copenh)* 114:298–304
- Glinoe D, Gershengorn MC, Robbins J 1976 Thyroxine-binding globulin biosynthesis in isolated monkey hepatocytes. *Biochim Biophys Acta* 418:232–244
- Glinoe D, McGuire RA, Gershengorn MC, Robbins J, Berman M 1977 Effects of estrogen on thyroxine-binding globulin metabolism in Rhesus monkeys. *Endocrinology* 100:9–17
- Glinoe D, Gershengorn MC, Dubois A, Robbins J 1977 Stimulation of thyroxine-binding globulin synthesis by isolated Rhesus monkey hepatocytes after *in vivo*  $\beta$ -estradiol administration. *Endocrinology* 100:807–813
- Gärtner R, Henze K, Horn K, Pickardt CR, Scriba PC 1981 Thyroxine-binding globulin: investigation of microheterogeneity. *J Clin Endocrinol Metab* 52:657–664
- Ain KB, Mori Y, Refetoff S 1987 Reduced clearance rate of thyroxine-binding globulin (TBG) with increased sialylation: a mechanism for estrogen-induced elevation of serum TBG concentration. *J Clin Endocrinol Metab* 65:689–696
- Ain KB, Refetoff S 1988 Relationship of oligosaccharide modification to the cause of serum thyroxine-binding globulin excess. *J Clin Endocrinol Metab* 66:1037–1043
- Gershengorn MC, Glinoe D, Robbins J 1980 Transport and metabolism of thyroid hormones. In: De Visscher M (ed) *Comprehensive Endocrinology: The Thyroid Gland*. Raven Press, New York, pp 81–121
- Refetoff S, Fang VS, Marshall JS, Robin NI 1976 Metabolism of thyroxine-binding globulin in man: abnormal rate of synthesis in inherited thyroxine-binding globulin deficiency and excess. *J Clin Invest* 57:485–495
- Ain KB, Refetoff S, Sarne DH, Murata Y 1988 Effect of estrogen on the synthesis and secretion of thyroxine-binding globulin by a human hepatoma cell line, HEP G2. *Mol Endocrinol* 2:313–323
- Glinoe D, Fernandez-Deville M, Ermans A-M 1978 Use of direct thyroxine-binding globulin measurement in the evaluation of thyroid function. *J Endocrinol Invest* 1:329–335
- Robbins J 1973 Inherited variations in thyroxine transport. *Mt Sinai J Med* 40:511–519
- Premachandra BN, Gossain VV, Perlstein IB 1977 Effect of pregnancy on thyroxine binding globulin (TBG) deficiency in partial TBG deficiency. *Am J Med Sci* 274:189–195
- Hotelling DR, Sherwood LM 1971 The effects of pregnancy on circulating triiodothyronine. *J Clin Endocrinol* 33:783–786
- Ericsson UB, Thorell JI 1986 A prospective critical evaluation of *in vitro* thyroid function tests. *Acta Med Scand* 220:47–56
- Fresco G, Curti G, Biggi A, Fontana B 1982 Comparison of calculated and measured free hormones in serum in health and in abnormal states. *Clin Chem* 28:1325–1329
- Szpunar WE, Stoffer SS, DiGiulio W 1987 Clinical evaluation of a thyroxine binding globulin assay in calculating a free thyroxine index in normal, thyroid disease, and sick euthyroid patients. *J Nucl Med* 28:1341–1343
- Oppenheimer JH 1968 Role of plasma proteins in the binding, distribution and metabolism of the thyroid hormones. *N Engl J Med* 278:1153–1162
- Dowling TJ, Appleton WG, Nicoloff JT 1967 Thyroxine turnover during human pregnancy. *J Clin Endocrinol Metab* 27:1749–1750
- Glinoe D 1991 The thyroid function during pregnancy: maternal and neonatal aspects. In: Beckers C, Reinwein D (eds) *The Thyroid and Pregnancy*. Schattauer, Stuttgart, New York, pp 35–43
- Pittman CS 1979 Hormone metabolism. In: DeGroot LJ, Cahill GF, Odell WD, Martini L, Potts JT, Nelson DH, Steinberger E, Winegrad AI (eds) *Endocrinology*. Grune & Stratton, New York, San Francisco, London, vol 1:365–372
- Glinoe D, De Nayer P, Bourdoux P, Lemone M, Robyn C, Van Steirteghem A, Kinthaert J, Lejeune B 1990 Regulation of maternal thyroid during pregnancy. *J Clin Endocrinol Metab* 71:276–287
- Becks GP, Burrow GN 1991 Thyroid disease and pregnancy. *Med Clin North Am* 75:121–150
- Glinoe D 1993 Thyroid regulation during pregnancy. In: Delange F, Dunn JT, Glinoe D (eds) *Iodine Deficiency in Europe: A Continuing Concern*. NATO ASI Series (Vol 241). Plenum Press, New York, pp 181–190
- Wilke TJ 1982 Five kits estimating free thyroxin concentration in serum evaluated, and correlated with other indices to thyroid status. *Clin Chem* 28:2051–2056
- Helenius T, Liewendahl K 1983 Improved dialysis method for free thyroxin in serum compared with five commercial radioimmunoassays in nonthyroidal illness and subjects with abnormal concentrations of thyroxin-binding globulin. *Clin Chem* 29:816–822
- Amino N, Nishi K, Nakatani K, Mizuta H, Ichihara K, Tanizawa O, Miyai K 1983 Effect of albumin concentration on the assay of serum free thyroxin by equilibrium radioimmunoassay with labeled thyroxin analog (Amerlex free T4). *Clin Chem* 29:321–325
- Parker JH 1985 Amerlex free triiodothyronine and free thyroxine levels in normal pregnancy. *Br J Obstet Gynaecol* 92:1234–1238
- Gow SM, Kellett HA, Seth J, Sweeting VM, Toft AD, Beckett GJ 1985 Limitations of new thyroid function tests in pregnancy. *Clin Chim Acta* 152:325–333
- Avalos E, De Nayer P, Beckers C 1986 Diagnostic value of free triiodothyronine in serum. *J Nucl Med* 27:1702–1705
- Sakata S, Komaki T, Shiraki S-I, Kumasaki N, Iwata H 1988 Effect of serum albumin concentration on free thyroxin (Amerlex FT4) values in healthy non-pregnant and pregnant women. *Clin Chim Acta* 176:225–226
- Nakagawa T, Matsumura K, Takeda K, Shinoda N, Matsuda A, Matsushita T 1990 Effect of stripping thyroxin from thyroxin-binding globulin on the measurement of free thyroxin in serum by equilibrium dialysis and by radioimmunoassay. *Clin Chem* 36:313–318
- Deam D, Goodwin M, Ratnaik S 1991 Comparison of four methods for free thyroxin. *Clin Chem* 37:569–574
- Roti E, Gardini E, Minelli R, Bianconi L, Flisi M 1991 Thyroid function evaluation by different commercially available free thyroid hormone measurement kits in term pregnant women and their newborns. *J Endocrinol Invest* 14:1–9
- Ball R, Freedman DB, Holmes JC, Midgley JEM, Sheehan P 1989

- Low-normal concentrations of free thyroxine in serum in late pregnancy: physiological fact, not technical artefact. *Clin Chem* 35: 1891-1896
48. **Burrow GN** 1993 Thyroid function and hyperfunction during gestation. *Endocr Rev* 14:194-202
  49. **Glinoe D** 1997 Maternal and fetal impact of chronic iodine deficiency. *Clin Obstet Gynecol* 40:102-116
  50. **Burrow GN, Fisher DA, Larsen PR** 1994 Maternal and fetal thyroid function. *N Engl J Med* 331:1072-1078
  51. **Ramey JN, Burrow GN, Polackwich RJ, Donabedian RK** 1975 The effect of oral contraceptive steroids on the response of thyroid-stimulating hormone to thyrotropin-releasing hormone. *J Clin Endocrinol Metab* 40:712-714
  52. **Ylikorkala O, Kivinen S, Reinila M** 1979 Serial prolactin and thyrotropin responses to thyrotropin-releasing hormone throughout normal human pregnancy. *J Clin Endocrinol Metab* 48:288-292
  53. **Farbota L, Hofman C, Oslapas R, Paloyan E** 1987 Sex hormone modulation of serum TSH levels. *Surgery* 101:1081-1087
  54. **Franklyn JA, Wood DF, Balfour NJ, Ramsden DB, Docherty K, Sheppard MC** 1987 Modulation by oestrogen of thyroid hormone effects on thyrotrophin gene expression. *J Endocrinol* 115:53-59
  55. **Donda A, Reymond F, Rey F, Lemarchand-Beraud T** 1990 Sex steroids modulate the pituitary parameters involved in the regulation of TSH secretion in the rat. *Acta Endocrinol (Copenh)* 122: 577-584
  56. **Kvetny J, Poulsen HK** 1984 Nuclear thyroxine and 3,5,3'-triiodothyronine receptors in human mononuclear blood cells during pregnancy. *Acta Endocrinol (Copenh)* 105:19-23
  57. **Souma JA, Nijadlik DC, Cottrell S, Rankel S** 1973 Comparison of thyroid function in each trimester of pregnancy with the use of triiodothyronine uptake, thyroxine iodine, free thyroxine, and free thyroxine index. *Am J Obstet Gynecol* 116:905-910
  58. **Larsen PR, Silva JE, Kaplan MM** 1981 Relationships between circulating and intracellular thyroid hormones: physiological and clinical implications. *Endocr Rev* 2:87-102
  59. **Meinhold H, Dudenhausen JW, Wenzel KW, Saling E** 1979 Amniotic fluid concentrations of 3, 5', 3'-triiodothyronine (reverse T<sub>3</sub>), 3, 3'-diiodothyronine, 3, 5, 3'-triiodothyronine (T<sub>3</sub>) and thyroxine (T<sub>4</sub>) in normal and complicated pregnancy. *Clin Endocrinol (Oxf)* 10:355-365
  60. **Cooper E, Aickin CM, Burke CW** 1980 Serum concentration of 3, 3', 5'-triiodothyronine (reverse T<sub>3</sub>) in normal pregnancy. *Clin Chim Acta* 106:347-349
  61. **Hidal JT, Kaplan MM** 1985 Characteristics of thyroxine 5'-deiodination in cultured human placental cells: regulation by iodothyronines. *J Clin Invest* 76:947-955
  62. **Roti E, Fang SL, Emerson CH, Braverman LE** 1981 Human placenta is an active site of thyroxine and 3, 3', 5-triiodothyronine tyrosyl ring deiodination. *J Clin Endocrinol Metab* 53:498-501
  63. **Fisher DA, Polk DH, Wu SY** 1994 Fetal thyroid metabolism: a pluralistic system. *Thyroid* 4:367-371
  64. **Torrigiani G, Doniach D, Roitt IM** 1969 Serum thyroglobulin levels in healthy subjects and in patients with thyroid disease. *J Clin Endocrinol* 29:305-314
  65. **Van Herle AJ, Uller RP, Matthews NL, Brown J** 1973 Radioimmunoassay for measurement of thyroglobulin in human serum. *J Clin Invest* 52:1320-1327
  66. **Pacini F, Pinchera A, Giani C, Grasso L, Doveri F, Baschieri L** 1980 Serum thyroglobulin in thyroid carcinoma and other thyroid disorders. *J Endocrinol Invest* 3:283-292
  67. **Roti E, Robuschi G, Bandini RE, Gnudi A** 1981 Radioimmunoassay of thyroglobulin in human serum: concentrations in normal subjects and in patients with thyroid disease. *J Nucl Med Allied Sci* 25:57-63
  68. **Rasmussen NG, Hornnes PJ, Hegedüs L, Feldt-Rasmussen U** 1989 Serum thyroglobulin during the menstrual cycle, during pregnancy, and post partum. *Acta Endocrinol (Copenh)* 121:168-173
  69. **Refetoff S, Lever EG** 1983 The value of serum thyroglobulin measurement in clinical practice. *JAMA* 250:2352-2356
  70. **Glinoe D, De Nayer P, Robyn C, Lejeune B, Kinthaert J, Meuris S** 1993 Serum levels of intact human chorionic gonadotropin (hCG) and its free  $\alpha$  and  $\beta$  subunits, in relation to maternal thyroid stimulation during normal pregnancy. *J Endocrinol Invest* 16:881-888
  71. **Glinoe D** 1993 Maternal thyroid function in pregnancy. *J Endocrinol Invest* 16:374-378
  72. **Davison JM** 1983 The kidney in pregnancy: a review. *J R Soc Med* 76:485-501
  73. **Cheung CK, Swaminathan R** 1989 Urinary excretion of some proteins and enzymes during normal pregnancy. *Clin Chem* 35:1978-1980
  74. **Dafnis E, Sabatini S** 1992 The effect of pregnancy on renal function: physiology and pathophysiology. *Am J Med Sci* 303:184-205
  75. **Halnan KE** 1958 The radioiodine uptake of the human thyroid in pregnancy. *Clin Sci* 17:281-290
  76. **Pochin EE** 1952 The iodine uptake of the human thyroid throughout the menstrual cycle and in pregnancy. *Clin Sci* 11:441-445
  77. **Aboul-Khair SA, Crooks J, Turnbull AC, Hytten FE** 1964 The physiological changes in thyroid function during pregnancy. *Clin Sci* 27:195-207
  78. **Aboul-Khair SA, Crooks J** 1965 A comparative study of iodine metabolism in pregnancy, sporadic goitre and thyrotoxicosis. *Acta Endocrinol (Copenh)* 48:14-22
  79. **Stoffer RP, Koeneke IA, Chesky VE, Hellwig CA** 1957 The thyroid in pregnancy. *Am J Obstet Gynecol* 74:300-306
  80. **Oddie TH, Fisher DA, Bernard B, Lam RW** 1977 Thyroid function at birth in infants of 30 to 45 weeks' gestation. *J Pediatr* 90:803-806
  81. **Ballabio M, Nicolini U, Jowett T, Ruiz de Elvira MC, Ekins RP, Rodeck CH** 1989 Maturation of thyroid function in normal human foetuses. *Clin Endocrinol (Oxf)* 33:565-571
  82. **Porterfield SP, Hendrich CE** 1993 The role of thyroid hormones in prenatal and neonatal neurological development-current perspectives. *Endocr Rev* 14:94-106
  83. **Bachrach LK, Burrow GN** 1985 Thyroid function in pregnancy: fetal-maternal relationships. In: Delange F, Fisher DA, Malvaux P (eds) *Pediatric Thyroidology*. Karger, Basel, vol 14:1-18
  84. **Smyth PPA, Hetherington AM, Ryan R, O'Herlihy C** 1991 Alterations in iodine status and thyroid volume in pregnancy. In: Beckers C, Reinwein D (eds) *The Thyroid and Pregnancy*. Schattauer, Stuttgart, New York, pp 55-58
  85. **Delange F, Bürgi H** 1989 Iodine deficiency disorders in Europe. *Bull WHO* 67:317-325
  86. **Delange F, Dunn JT, Glinoe D** 1993 General comments, conclusions and final recommendations. In: Delange F, Dunn JT, Glinoe D (eds) *Iodine Deficiency in Europe: A Continuing Concern*. NATO ASI Series (Vol 241). Plenum Press, New York, pp 473-478
  87. **Delange F** 1994 The disorders induced by iodine deficiency. *Thyroid* 4:107-128
  88. **Beckers C, Ermans A, De Nayer P, Delange F, Glinoe D, Bourdoux P** 1993 Status of iodine nutrition and thyroid function in Belgium. In: Delange F, Dunn JT, Glinoe D (eds) *Iodine Deficiency in Europe: A Continuing Concern*. NATO ASI Series (Vol 241). Plenum Press, New York, pp 359-362
  89. **Thilly C, Vanderpas JB, Bebe N, Ntambue K, Contempre B, Swennen B, Moreno-Reyes R, Bourdoux P, Delange F** 1992 Iodine deficiency, other trace elements and goitrogenic factors in the etio-pathogeny of iodine deficient disorders. *Biol Trace Elem Res* 32: 229-243
  90. **Werner SC** 1958 The effect of triiodothyronine administration on the elevated protein-bound iodine level in human pregnancy. *Am J Obstet Gynecol* 75:1193-1196
  91. **Raiti S, Holsman GB, Scott RL, Blizzard RM** 1967 Evidence for the placental transfer of triiodothyronine in human beings. *N Engl J Med* 277:456-459
  92. **Burrow GN, Polackwich R, Donabedian R** 1975 The hypothalamic-pituitary-thyroid axis in normal pregnancy. In: Fisher DA, Burrow GN (eds) *Perinatal Thyroid Physiology and Disease*. Raven Press, New York, pp 1-10
  93. **Kannan V, Sinha MK, Devi PK, Rastogi GK** 1973 Plasma thyrotropin and its response to thyrotropin releasing hormone in normal pregnancy. *Obstet Gynecol* 42:547-549
  94. **Vandalem JL, Pirens G, Hennen G, Gaspard U** 1977 Thyroliberin and gonadoliberein tests during pregnancy and the puerperium. *Acta Endocrinol (Copenh)* 86:695-703

95. Fisher DA, Hobel CJ, Garza R, Pierce CA 1970 Thyroid function in the preterm fetus. *Pediatrics* 46:208–216
96. Yamamoto T, Amino N, Tanizawa O, Doi K, Ichihara K, Azukizawa M, Miyai K 1979 Longitudinal study of serum thyroid hormones, chorionic gonadotropin and thyrotrophin during and after normal pregnancy. *Clin Endocrinol (Oxf)* 10:459–468
97. Lemarchand-Beraud T, Vannotti A 1969 Relationships between blood thyrotrophin level, protein bound iodine and free thyroxine concentration in man under physiological conditions. *Acta Endocrinol (Copenh)* 60:315–326
98. Braunstein GD, Hershman JM 1976 Comparison of serum pituitary thyrotrophin and chorionic gonadotropin concentrations during pregnancy. *J Clin Endocrinol Metab* 42:1123–1126
99. Hennen G, Pierce JG, Freychet P 1969 Human chorionic thyrotrophin: further characterization and study of its secretion during pregnancy. *J Clin Endocrinol Metab* 29:581–594
100. Harada A, Hershman JM, Reed AW, Braunstein GD, Dignam WJ, Derzko C, Friedman S, Jewelewicz R, Pekary AE 1979 Comparison of thyroid stimulators and thyroid hormone concentrations in the sera of pregnant women. *J Clin Endocrinol Metab* 48:793–797
101. Hershman JM, Higgins HP 1971 Hydatiform mole — a cause of clinical hyperthyroidism. *N Engl J Med* 284:573–577
102. Hershman JM 1972 Hyperthyroidism induced by trophoblastic thyrotrophin. *Mayo Clin Proc* 41:913–918
103. Kenimer JC, Hershman JM, Higgins HP 1975 The thyrotrophin in hydatiform moles in human chorionic gonadotropin. *J Clin Endocrinol Metab* 40:482–491
104. Mann K, Hoermann R 1993 Thyroid stimulation by placental factors. *J Endocrinol Invest* 16:378–384
105. Hershman JM 1992 Editorial: role of human chorionic gonadotropin as a thyroid stimulator. *J Clin Endocrinol Metab* 74:258–259
106. Godeau P, Bletty O, Garin JL, Amiel JL, Lambolez T, Brochard C, Beaulieu JL 1980 Hyperthyroïdie par choriocarcinome placentaire: un cas avec revue de la littérature. *Ann Méd Interne (Paris)* 131:223–227
107. Lemon M, Bevan BR, Li TC, Pennington GW 1987 Thyroid function in trophoblastic disease. *Br J Obstet Gynaecol* 94:1084–1088
108. Desai RK, Norman RJ, Jialal I, Joubert SM 1988 Spectrum of thyroid function abnormalities in gestational trophoblastic neoplasia. *Clin Endocrinol (Oxf)* 29:583–592
109. Kennedy RL, Sheridan E, Darne J, Griffiths H, Davies R, Price A, Cohn M 1990 Thyroid function in choriocarcinoma: demonstration of a thyroid stimulating activity in serum using FRTL-5 and human thyroid cells. *Clin Endocrinol (Oxf)* 33:227–237
110. Kung AW, Ma JT, Wang C, Young RT 1990 Hyperthyroidism during pregnancy due to the coexistence of *struma ovarii* and Graves' disease. *Postgrad Med J* 66:132–133
111. Cain HJ, Pannall PR, Kotasek D, Norman RJ 1991 Choriogonadotropin-mediated thyrotoxicosis in a man. *Clin Chem* 37:1127–1131
112. Brousse C, Mignot L, Baglin AC, Bernard N, Piette AM, Gepner P, Chapman A 1994 Hyperthyroïdie et hypersécrétion de gonadotrophine chorionique au cours d'un adénocarcinome gastrique. *Rev Méd Interne* 15:830–833
113. Toda S, Inoue Y, Ishino T, Yonemitsu N, Terayama K, Miyabara S, Sugihara H 1995 A rare case of primary pulmonary choriocarcinoma in a male: immunohistochemical detection for human chorionic gonadotropin, epidermal growth factor (EGF) and EGF-receptor. *Endocr J* 42:655–659
114. Taliadouros GS, Canfield RE, Nisula BC 1978 Thyroid-stimulating activity of chorionic gonadotropin and luteinizing hormone. *J Clin Endocrinol Metab* 47:855–860
115. Davies TF, Taliadouros GS, Catt KJ, Nisula BC 1979 Assessment of urinary thyrotrophin-competing in choriocarcinoma and thyroid disease: further evidence for human chorionic gonadotropin interacting at the thyroid cell membrane. *J Clin Endocrinol Metab* 49:353–357
116. Yoshimura M, Pekary AE, Pang X-P, Berg L, Goodwin TM, Hershman JM 1994 Thyrotropic activity of basic isoelectric forms of human chorionic gonadotropin extracted from hydatidiform mole tissues. *J Clin Endocrinol Metab* 78:862–866
117. Mann K, Schneider N, Hoermann R 1986 Thyrotropic activity of acidic isoelectric variants of human chorionic gonadotropin from trophoblastic tumors. *Endocrinology* 118:1558–1566
118. Nishimura R, Ide K, Utsunomiya T, Kitajima T, Yuki Y, Mochizuki M 1988 Fragmentation of the  $\beta$ -subunit of human chorionic gonadotropin produced by choriocarcinoma. *Endocrinology* 123:420–425
119. Pekary AE, Jackson IM, Goodwin TM, Pang X-P, Hein MD, Hershman JM 1993 Increased *in vitro* thyrotropic activity of partially sialated human chorionic gonadotropin extracted from hydatidiform moles of patients with hyperthyroidism. *J Clin Endocrinol Metab* 76:70–74
120. Guillaume J, Schussler GC, Goldman J 1985 Components of the total serum thyroid hormone concentrations during pregnancy: high free thyroxine and blunted thyrotrophin (TSH) response to TSH-releasing hormone in the first trimester. *J Clin Endocrinol Metab* 60:678–684
121. Pekonen F, Alfthan H, Stenman U-H, Ylikorkala O 1988 Human chorionic gonadotropin (hCG) and thyroid function in early human pregnancy: circadian variation and evidence for intrinsic thyrotropic activity of hCG. *J Clin Endocrinol Metab* 66:853–856
122. Ballabio M, Poshayachinda M, Ekins RP 1991 Pregnancy-induced changes in thyroid function: role of human chorionic gonadotropin as putative regulator of maternal thyroid. *J Clin Endocrinol Metab* 73:824–831
123. Silva JE, Silva S 1981 Interrelationships among serum thyroxine, triiodothyronine, reverse triiodothyronine, and thyroid-stimulating hormone in iodine-deficient pregnant women and their offspring: effects of iodine supplementation. *J Clin Endocrinol Metab* 52:671–677
124. Weeke J, Dybkjaer L, Granlie K, Jensen SE, Kjaerulff E, Laurberg P, Magnusson B 1982 A longitudinal study of serum TSH and total and free thyronines during normal pregnancy. *Acta Endocrinol (Copenh)* 101:531–537
125. Smith SC, Bold AM 1983 Interpretation of *in-vitro* thyroid function tests during pregnancy. *Br J Obstet Gynaecol* 90:532–534
126. Pacchiarotti A, Martino E, Bartalena L, Buratti L, Mammoli C, Strigini F, Fruzzetti F, Melis GB, Pinchera A 1986 Serum thyrotrophin by ultrasensitive immunoradiometric assay and serum free thyroid hormones in pregnancy. *J Endocrinol Invest* 9:185–189
127. Fung HY, Kologlu M, Collison K, John R, Richards CJ, Hall R, McGregor AM 1988 Postpartum thyroid dysfunction in Mid Glamorgan. *Br Med J* 296:241–244
128. Price A, Griffiths H, Morris BW 1989 A longitudinal study of thyroid function in pregnancy. *Clin Chem* 35:275–278
129. Rodin A, Mashiter G, Quartero R, Pistofidis G, Fogelman I, Maisey MN, Chapman MG, Clarke S 1989 Thyroid function in normal pregnancy. *J Obstet Gynaecol* 10:89–94
130. Rasmussen NG, Hornnes PJ, Hegedüs L 1989 Ultrasonographically determined thyroid size in pregnancy and post partum: the goitrogenic effect of pregnancy. *Am J Obstet Gynecol* 160:1216–1220
131. Pedersen KM, Laurberg P, Iversen E, Knudsen PR, Gregersen HE, Rasmussen OS, Larsen KR, Eriksen GM, Johannesen PL 1993 Amelioration of some pregnancy-associated variations in thyroid function induced by iodine supplementation. *J Clin Endocrinol Metab* 77:1078–1083
132. Berghout A, Ender E, Ross A, Hogerzeil HV, Smits NJ, Wiersinga WM 1994 Thyroid function and thyroid size in normal pregnant women living in an iodine replete area. *Clin Endocrinol (Oxf)* 41:375–379
133. Kosugi S, Mori T 1995 TSH receptor and LH receptor, 1995. *Endocr J* 42:587–606
134. Grün JP, Meuris S, De Nayer P, Glinier D, The thyrotropic role of human chorionic gonadotropin (hCG) in the early stages of twin (*vs.* single) pregnancy. *Clin Endocrinol (Oxf)*, in press
135. Hershman JM, Lee H-Y, Sugawara M, Mirell CJ, Pang X-P, Yanagisawa M, Pekary AE 1988 Human chorionic gonadotropin stimulates iodide uptake, adenylate cyclase, and deoxyribonucleic acid synthesis in cultured rat thyroid cells. *J Clin Endocrinol Metab* 67:74–79
136. Yoshikawa N, Nishikawa M, Horimoto M, Yoshimura M, Toyoda N, Inada M 1990 Human chorionic gonadotropin promotes thyroid growth via thyrotrophin receptors in FRTL-5 cells. *Endocrinol Jpn* 37:639–648
137. Yoshimura M, Nishikawa M, Mori Y, Yoshikawa N, Horimoto M, Toyoda N, Inada M 1992 Human chorionic gonadotropin induces c-myc mRNA expression via TSH receptor in FRTL-5 rat thyroid cells. *Thyroid* 2:315–319
138. Tomer Y, Huber GK, Davies TF 1992 Human chorionic gonado-

- troponin (hCG) interacts directly with recombinant human TSH receptors. *J Clin Endocrinol Metab* 74:1477-1479
139. Yoshimura M, Hershman JM, Pang X-P, Berg L, Pekary AE 1993 Activation of the thyrotropin (TSH) receptor by human chorionic gonadotropin and luteinizing hormone in Chinese hamster ovary cells expressing the functional human TSH receptor. *J Clin Endocrinol Metab* 77:1009-1013
  140. Kraim Z, Sadeh O, Nisula B 1994 Human chorionic gonadotropin stimulates thyroid hormone secretion, iodide uptake, organification, and adenosine 3', 5'-monophosphate formation in cultured human thyrocytes. *J Clin Endocrinol Metab* 79:595-599
  141. Yoshimura M, Nishikawa M, Horimoto M, Yoshikawa N, Sawaragi S, Horokoshi Y, Sawaragi I, Inada M 1990 Thyroid-stimulating activity of human chorionic gonadotropin in sera of pregnant women. *Acta Endocrinol (Copenh)* 123:277-281
  142. Yoshimura M, Hershman JM 1995 Thyrotropic action of human chorionic gonadotropin. *Thyroid* 5:425-434
  143. Magner JA 1990 Thyroid stimulating hormone: biosynthesis, cell biology and bioactivity. *Endocr Rev* 11:354-385
  144. Vassart G, Dumont JE 1992 The thyrotropin receptor and the regulation of thyrocyte function and growth. *Endocr Rev* 13:596-611
  145. Bockaert J 1995 Les récepteurs à sept domaines transmembranaires: physiologie et pathologie de la transduction. *Médecine/Sciences* 11:382-394
  146. Jameson JL, Hollenberg AN 1993 Regulation of chorionic gonadotropin gene expression. *Endocr Rev* 14:203-221
  147. Lustbader JW, Yarmush DL, Birken S, Puett D, Canfield RE 1993 The application of chemical studies of human chorionic gonadotropin to visualize its three-dimensional structure. *Endocr Rev* 14:291-311
  148. Ascoli M, Segaloff DL 1989 On the structure of the luteinizing hormone/chorionic gonadotropin receptor. *Endocr Rev* 10:27-44
  149. Segaloff DL, Ascoli M 1993 The lutropin/choriogonadotropin receptor. . . 4 years later. *Endocr Rev* 14:324-347
  150. Glinoe D 1995 The thyroid in pregnancy: a European perspective. *Thyroid Today* 18:1-11
  151. Glinoe D 1994 The thyroid gland and pregnancy: iodine restriction and goitrogenesis revealed. *Thyroid Int* 5:1-16
  152. Levy RP, Newman DM, Rejali LS, Barford DA 1980 The myth of goiter in pregnancy. *Am J Obstet Gynecol* 137:701-703
  153. Glinoe D 1996 Maternal and neonatal thyroid function in mild iodine deficiency. In: Nauman J, Glinoe D, Braverman LE, Hostalek U (eds) *The Thyroid and Iodine*. Schattauer, Stuttgart, New York, pp 129-143
  154. Nohr SB, Laurberg P, Borlum KG, Pedersen KM, Johannesen PL, Damm P, Fuglsang E, Johansen A 1993 Iodine deficiency in pregnancy in Denmark. Regional variations and frequency of individual iodine supplementation. *Acta Obstet Gynecol Scand* 72:350-353
  155. Wada L, King JC 1994 Trace element nutrition during pregnancy. *Clin Obstet Gynecol* 37:574-586
  156. Dunn JT 1994 The use of iodized oil and other alternatives for the elimination of iodine deficiency disorders. In: Hetzel BS, Pandav CS (eds) *S.O.S. for a Billion: The Conquest of Iodine Deficiency Disorders*. Oxford University Press Publications, New Delhi, pp 108-117
  157. Ermans AM 1994 Prevention of iodine deficiency disorders by oral iodized oil. *Eur J Endocrinol* 130:545-546
  158. A Statement by the World Health Organization 1996 Safe use of iodized oil to prevent iodine deficiency in pregnant women. *Bull WHO* 74:1-3
  159. Delange F 1996 Administration of iodized oil during pregnancy: a summary of the published evidence. *Bull WHO* 74:101-108
  160. Glinoe D, Lemone M 1992 Goiter and pregnancy: a new insight into an old problem. *Thyroid* 2:65-70
  161. Vermiglio F, Lo Presti VP, Scaffidi Argentina G, Finocchiaro MD, Gullo D, Squatrito S, Trimarchi F 1995 Maternal hypothyroxinemia during the first half of gestation in an iodine deficient area with endemic cretinism and related disorders. *Clin Endocrinol (Oxf)* 42:409-415
  162. Wilke TJ 1983 Free thyroxine index, thyroid hormone/thyroxin-binding globulin ratio, triiodothyronine uptake, and thyroxin-binding globulin compared for diagnostic value regarding thyroid function. *Clin Chem* 29:74-79
  163. Amino N, Yabu Y, Miki T, Morimoto S, Kumahara Y, Mori H, Iwatani Y, Nishi K, Nakatani K, Miyai K 1981 Serum ratio of triiodothyronine to thyroxine and thyroxine-binding globulin and calcitonin concentrations in Graves's disease and destruction-induced thyrotoxicosis. *J Clin Endocrinol Metab* 53:113-116
  164. Laurberg P 1980 Iodothyronine release from the perfused canine thyroid following cessation of stimulation: rapid decline of triiodothyronines in comparison with thyroxine. *J Clin Invest* 65:488-495
  165. Delange F, Ermans AM 1991 Iodine deficiency. In: Braverman LE, Utiger RD (eds) *The Thyroid — A Fundamental and Clinical Textbook*, ed 6. Lippincott Company, Philadelphia, pp 368-390
  166. Glinoe D, De Nayer P, Delange F, Lemone M, Toppet V, Spehl M, Grün JP, Kinthaert J, Lejeune B 1995 A randomized trial for the treatment of mild iodine deficiency during pregnancy: maternal and neonatal effects. *J Clin Endocrinol Metab* 80:258-269
  167. Glinoe D, Lemone M, Bourdoux P, De Nayer P, Delange F, Kinthaert J, Lejeune B 1992 Partial reversibility during late postpartum of thyroid abnormalities associated with pregnancy. *J Clin Endocrinol Metab* 74:453-457
  168. Thilly CH, Delange F, Lagasse R, Bourdoux P, Ramioul L, Berquist H, Ermans AM 1978 Fetal hypothyroidism and maternal status in severe endemic goiter. *J Clin Endocrinol Metab* 47:354-360
  169. Pedersen KM, Børlum KG, Knudsen PR, Hansen E-S, Johannesen PL, Laurberg P 1988 Urinary iodine excretion is low and serum thyroglobulin high in pregnant women in parts of Denmark. *Acta Obstet Gynecol Scand* 67:413-416
  170. Gonzalez-Jimenez A, Fernandez-Soto ML, Escobar-Jimenez F, Glinoe D, Navarrete L 1993 Thyroid function parameters and TSH-receptor antibodies in healthy subjects and Graves' disease patients: a sequential study before, during and after pregnancy. *Thyroidol Clin Exp* 5:13-20
  171. Crooks J, Tulloch MI, Turnbull AC, Davidsson D, Skulason T, Snaedel G 1967 Comparative incidence of goiter in pregnancy in Iceland and Scotland. *Lancet* 2:625-627
  172. Brander A, Kivisaari L 1989 Ultrasonography of the thyroid during pregnancy. *J Clin Ultrasound* 17:403-406
  173. Romano R, Jannini EA, Pepe M, Grimaldi A, Olivieri M, Spennati P, Cappa F, D'Armiento M 1991 The effects of iodophylaxis on thyroid size during pregnancy. *Am J Obstet Gynecol* 164:482-485
  174. Liesenkötter KP, Göpel W, Bogner U, Stach B, Grüters A 1996 Earliest prevention of endemic goiter by iodine supplementation during pregnancy. *Eur J Endocrinol* 134:443-448
  175. Struve C, Ohlen S 1990 Einfluss früherer schwangerschaften auf struma- und knotenhäufigkeit bei schilddrüsengesunden frauen. *Dtsch Med Wochenschr* 115:1050-1053
  176. Bauch K, Meng W, Ulrich FE, Grosse E, Kempe R, Schönmeyer F, Sterzel G, Seitz W, Möckel G, Weber A, Tiller R, Rockel A, Dempe A, Seige K 1986 Thyroid status during pregnancy and post partum in regions of iodine deficiency and endemic goiter. *Endocrinol Exp* 20:67-77
  177. Laurberg P 1994 Editorial: iodine intake — what are we aiming at? *J Clin Endocrinol Metab* 79:17-19
  178. Chaouki ML, Benmiloud M 1994 Prevention of iodine deficiency disorders by oral administration of lipiodol during pregnancy. *Eur J Endocrinol* 130:547-551
  179. Benmiloud M, Chaouki ML, Gutekunst R, Teichert HM, Wood WG, Dunn JT 1994 Oral iodized oil for correcting iodine deficiency: optimal dosing and outcome of indicator selection. *J Clin Endocrinol Metab* 79:20-24
  180. Elnagar B, Eltom M, Karlsson FA, Ermans AM, Gebremedhin M, Bourdoux P 1995 The effects of different doses of oral iodized oil on goiter size, urinary iodine, and thyroid-related hormones. *J Clin Endocrinol Metab* 80:891-897
  181. Fisher DA 1985 Ontogenesis of hypothalamic-pituitary-thyroid function in the human fetus. In: Delange F, Fisher DA, Malvaux P (eds) *Pediatric Thyroidology — Pediatric and Adolescent Endocrinology*. Karger, Basel, vol 14:19-32
  182. Fisher DA, Polk DH 1989 Maturation of thyroid hormone actions. In: Delange F, Fisher DA, Glinoe D (eds) *Research in Congenital Hypothyroidism*. NATO ASI Series. Plenum Press, New York, vol 161:61-75

183. **Delange F, Bourdoux P, Laurence M, Peneva L, Walfish P, Willgerodt H** 1993 Neonatal thyroid function in iodine deficiency. In: Delange F, Dunn JT, Glinioer D (eds) *Iodine Deficiency in Europe: A Continuing Concern*. NATO ASI Series. Plenum Press, New York, vol 241:199–209
184. **Morreale de Escobar G, Pastor R, Obregon MJ, Escobar del Rey F** 1985 Effects of maternal hypothyroidism on the weight and thyroid hormone content of rat embryonic tissues, before and after onset of fetal thyroid function. *Endocrinology* 117:1890–1900
185. **Contempre B, Jauniaux E, Calvo R, Jurkovic D, Campbell S, Morreale de Escobar G** 1993 Detection of thyroid hormones in human embryonic cavities during the first trimester of pregnancy. *J Clin Endocrinol Metab* 77:1719–1722
186. **Morreale de Escobar G, Calvo R, Escobar del Rey F, Obregon MJ** 1994 Thyroid hormones in tissues from fetal and adult rats. *Endocrinology* 134:2410–2415
187. **De Vijlder JJM, Vulsma T, Kooistra L, Piosik P, Baas F, Kok JH** 1996 The importance of partial deprivation of iodine and thyroid hormone during pregnancy for the offspring. In: Nauman J, Glinioer D, Braverman LE, Hostalek U (eds) *The Thyroid and Iodine*. Schattauer, Stuttgart, pp 123–127
188. **Glinioer D, Delange F, Laboureur I, De Nayer P, Lejeune B, Kinthaert J, Bourdoux P** 1992 Maternal and neonatal thyroid function at birth in an area of marginally low iodine intake. *J Clin Endocrinol Metab* 75:800–805
189. **Delange F, Bourdoux P, Chanoine JP, Ermans AM** 1988 Physiopathology of iodine nutrition during pregnancy, lactation, and early postnatal life. In: Berger H (ed) *Vitamins and Minerals in Pregnancy and Lactation*. Raven Press, New York, pp 205–213
190. **Delange F** 1989 Iodine nutrition and congenital hypothyroidism In: Delange F, Fisher DA, Glinioer D (eds) *Research in Congenital Hypothyroidism*. NATO ASI Series. Plenum Press, New York, vol 161:173–185
191. **Thilly C, Swennen B, Moreno-Reyes R, Hindlet JY, Bourdoux P, Vanderpas J** 1994 Maternal, fetal, and juvenile hypothyroidism, birth weight and infant mortality in the etiopathogenesis of the IDD spectra in Zaïre and Malawi. In: Stanbury J (ed) *The Damaged Brain of Iodine Deficiency*. Cognizant Communications, New York, pp 241–250
192. **Grodstein F, Goldman MB, Ryan L, Cramer DW** 1993 Self reported use of pharmaceuticals and primary ovulatory infertility. *Epidemiology* 4:151–156
193. **Peterson M** 1994 Thyroid disease and fertility. *Immunol Allergy Clin North Am* 14:725–738
194. **Hemken RW, Vandersall JH, Oskarsson MA, Fryman LR** 1972 Iodine intake related to milk iodine and performance of dairy cattle. *J Dairy Sci* 55:931–934
195. **Korber R, Rossow N, Otta J** 1985 Iodine deficiency syndrome in cattle, sheep and swine. *Monatsh Veterinarmed* 40:220–224
196. **Ryot KD, Sharma BK, Panwar CD** 1990 Effect of iodine therapy in anoestrous bovines. *Ind J Anim Prod* 11:144–145
197. **Carr EA, Beierwaltes WH, Raman G, Dodson VN, Tanton J, Betts JS, Staubaugh RA** 1959 The effect of maternal thyroid function on fetal thyroid function and development. *J Clin Endocrinol Metab* 19:1–18
198. **Greenman GW, Gabrielson MO, Howard-Flanders J, Wessel MA** 1962 Thyroid dysfunction in pregnancy: fetal loss and followup evaluation of surviving infants. *N Engl J Med* 267:426–431
199. **Montoro M, Colleá JV, Frasier SD, Mestman JH** 1981 Successful outcome of pregnancy in women with hypothyroidism. *Ann Intern Med* 94:31–34
200. **Davis LE, Leveno KJ, Cunningham FG** 1988 Hypothyroidism complicating pregnancy. *Obstet Gynecol* 72:108–112
201. **Wasserstrum N, Anania CA** 1995 Perinatal consequences of maternal hypothyroidism in early pregnancy and inadequate replacement. *Clin Endocrinol (Oxf)* 42:353–358
202. **Lowe TW, Cunningham FG** 1991 Pregnancy and thyroid disease. *Clin Obstet Gynecol* 34:72–81
203. **Leung AS, Millar LK, Koonings PP, Montoro M, Mestman JH** 1993 Perinatal outcome in hypothyroid pregnancies. *Obstet Gynecol* 81:349–353
204. **Mestman JH, Goodwin M, Montoro MM** 1995 Thyroid disorders of pregnancy. *Endocrinol Metab Clin North Am* 14:41–71
205. **Man EB, Brown JF, Serunian SA** 1991 Maternal hypothyroxinemia: psychoneurological deficits of progeny. *Ann Clin Lab Sci* 21:227–239
206. **Bakimer R, Cohen JR, Shoenfeld Y** 1994 What really happens to fecundity in autoimmune diseases? *Immunol Allergy Clin North Am* 14:701–723
207. **Van der Spuy ZM, Jacobs HS** 1984 Management of endocrine disorders in pregnancy - part I: thyroid and parathyroid disease. *Postgrad Med J* 60:245–252
208. **Girling JC, de Swiet M** 1992 Thyroxine dosage during pregnancy in women with primary hypothyroidism. *Br J Obstet Gynaecol* 99:368–370
209. **Costante C, Crupi D, Trimarchi F, Demeester-Mirkine N** 1987 Hypothyroidism induced by pregnancy in a patient submitted to suppressive L-thyroxine therapy. *J Endocrinol Invest* 10:527
210. **Larsen PR** 1992 Monitoring thyroxine treatment during pregnancy (comment). *Thyroid* 2:153–154
211. **Mandel SJ, Larsen PR, Seely EW, Brent GA** 1990 Increased need for thyroxine during pregnancy in women with primary hypothyroidism. *N Engl J Med* 323:91–96
212. **Kaplan MM** 1992 Monitoring thyroxine treatment during pregnancy. *Thyroid* 2:147–152
213. **Tamaki H, Amino N, Takeoka K, Mitsuda N, Miyai K, Tanizawa O** 1990 Thyroxine requirement during pregnancy for replacement therapy of hypothyroidism. *Obstet Gynecol* 76:230–233
214. **Toft AD** 1994 Thyroxine therapy. *N Engl J Med* 331:174–180
215. **McDougall IR, Maclin N** 1995 Hypothyroid women need more thyroxine when pregnant. *J Fam Pract* 41:238–240
216. **Roti E, Minelli R, Salvi M** 1996 Management of hyperthyroidism and hypothyroidism in the pregnant woman. *J Clin Endocrinol Metab* 81:1679–1682
217. **Potter JD** 1980 Hypothyroidism and reproductive failure. *Surg Gynecol Obstet* 150:251–255
218. **Lazarus JH, Othman S** 1991 Thyroid disease in relation to pregnancy. *Clin Endocrinol (Oxf)* 34:91–98
219. **Thys M, Siquet M, Hennen G** 1992 Grossesse, fonctions thyroïdiennes et maladies autoimmunes. *Rev Méd Liège* 47:185–199
220. **Jovanovic-Peterson L, Peterson CM** 1988 De novo hypothyroidism in pregnancies complicated by type I diabetes, subclinical hypothyroidism, and proteinuria: a new syndrome. *Am J Obstet Gynecol* 159:442–446
221. **Bech K, Hoier-Madsen M, Feldt-Rasmussen U, Jensen BM, Molsted-Pedersen L, Kühl C** 1991 Thyroid function and autoimmune manifestations in insulin-dependent diabetes mellitus during and after pregnancy. *Acta Endocrinol (Copenh)* 124:534–539
222. **Klein RZ, Haddow JE, Faix JD, Brown RS, Hermos RJ, Pulkkinen A, Mitchell ML** 1991 Prevalence of thyroid deficiency in pregnant women. *Clin Endocrinol (Oxf)* 35:41–46
223. **Glinioer D, Fernandez-Soto ML, Bourdoux P, Lejeune B, Delange F, Lemone M, Kinthaert J, Robyn C, Grün JP, De Nayer P** 1991 Pregnancy in patients with mild thyroid abnormalities: maternal and neonatal repercussions. *J Clin Endocrinol Metab* 73:421–427
224. **Glinioer D, Rihai M, Grün JP, Kinthaert J** 1994 Risk of subclinical hypothyroidism in pregnant women with asymptomatic autoimmune thyroid disorders. *J Clin Endocrinol Metab* 79:197–204
225. **Gordin A, Saarinen P, Pelkonen R, Lamberg PA** 1974 Serum thyrotrophin and the response to thyrotrophin releasing hormone in symptomless autoimmune thyroiditis and in borderline and overt hypothyroidism. *Acta Endocrinol (Copenh)* 75:274–285
226. **Ferrari C, Paracchi A, Parisio E, Codecasa F, Mucci M, Boghen M, Gerevini G, Rampini P** 1987 Serum free thyroid hormones in different degrees of hypothyroidism and euthyroid autoimmune thyroiditis. *Acta Endocrinol (Copenh)* 114:559–564
227. **Deboel S, Bonnyns M, Jonckheer M, Buydens P, Smits J, Finne E, Vanhaelst L** 1987 Thyroid hormone reserve in asymptomatic autoimmune thyroiditis. *Acta Endocrinol (Copenh)* 114:336–339
228. **Vanderpump MP, Tunbridge WM, French JM, Appleton D, Bates D, Clark F, Grimley-Evans J, Rodgers H, Tunbridge F** 1995 The incidence of thyroid disorders in a community: a twenty-year follow-up of the Whickham survey. *Clin Endocrinol (Oxf)* 43:55–68
229. **Stagnaro-Green A, Roman H, Cobin H, El Harazy E, Alvarez-Marfani M, Davies TF** 1990 Detection of at-risk pregnancy by

- means of highly sensitive assays for thyroid autoantibodies. *JAMA* 264:1422-1425
230. Lejeune B, Grün JP, De Nayer P, Servais G, Glinoeir D 1993 Antithyroid antibodies underlying thyroid abnormalities and miscarriage or pregnancy-induced hypertension. *Br J Obstet Gynaecol* 100:669-672
  231. Pratt DE, Kaberlein G, Dudkiewicz A, Gleicher N 1993 The association of antithyroid antibodies in euthyroid nonpregnant women with recurrent first trimester abortions in the next pregnancy. *Fertil Steril* 60:1001-1005
  232. Bussen S, Steck T 1995 Thyroid autoantibodies in euthyroid nonpregnant and pregnant women with recurrent abortions. *Hum Reprod* 10:2938-2940
  233. Innerfield R, Hollander CS 1977 Thyroidal complications of pregnancy. *Med Clin North Am* 61:67-87
  234. Drury MI 1986 Hyperthyroidism and pregnancy. *J R Soc Med* 79:317-318
  235. Amino N, Tanizawa O, Mori H, Iwatani Y, Tamada T, Kurachi K, Kamahara Y, Miyai K 1982 Aggravation of thyrotoxicosis in early pregnancy and after delivery in Graves' disease during pregnancy. *J Clin Endocrinol Metab* 55:108-112
  236. Sidibe EH, Bengali-Cissiko L, Bah MD, Sow AM, Correa P 1995 Cinquante et une observations de maladie de Basedow et grossesse. *Sem Hôp Paris* 71:824-828
  237. Tamaki H, Itoh E, Kaneda T, Asahi K, Mitsuda N, Tanizawa O, Amino N 1993 Crucial role of human chorionic gonadotropin for the aggravation of thyrotoxicosis in early pregnancy in Graves' disease. *Thyroid* 3:189-193
  238. Burrow GN 1978 Hyperthyroidism in pregnancy. *Thyroid Today* 1:1-5
  239. Barron WM 1984 The pregnant surgical patient: medical evaluation and management. *Ann Intern Med* 101:683-691
  240. Weber CA, Clark OH 1985 Surgery for thyroid disease. *Med Clin North Am* 69:1097-1115
  241. Ramsay I, Kaur S, Krassas G 1983 Thyrotoxicosis in pregnancy: results of treatment by antithyroid drugs combined with T<sub>4</sub>. *Clin Endocrinol (Oxf)* 18:73-85
  242. Rosen H 1986 Drug therapy for Graves' disease during pregnancy. *N Engl J Med* 315:1485-1486
  243. Sherif IH, Oyan WT, Bosairi S, Carrascal SM 1991 Treatment of hyperthyroidism in pregnancy. *Acta Obstet Gynecol Scand* 70:461-463
  244. Mandel SJ, Brent GA, Larsen PR 1994 Review of antithyroid drug use during pregnancy and report of a case of aplasia cutis. *Thyroid* 4:129-133
  245. Wing DA, Millar LK, Koonings PP, Montoro MN, Mestman JH 1994 A comparison of propylthiouracil *vs.* methimazole in the treatment of hyperthyroidism in pregnancy. *Am J Obstet Gynecol* 170:90-95
  246. Cheron RG, Kaplan MM, Larsen PR, Selenkow HA, Crigler Jr JF 1981 Neonatal thyroid function after propylthiouracil therapy for maternal Graves' disease. *N Engl J Med* 304:525-528
  247. Gardner DF, Cruikshank DP, Hays PM, Cooper DS 1986 Pharmacology of propylthiouracil (PTU) in pregnant hyperthyroid women: correlation of maternal PTU concentrations with cord serum thyroid function tests. *J Clin Endocrinol Metab* 62:217-220
  248. Momotani N, Noh J, Oyanagi H, Ishikawa N, Ito K 1986 Antithyroid drug therapy for Graves' disease during pregnancy. *N Engl J Med* 315:24-28
  249. Sugrue D, Drury MI 1980 Hyperthyroidism complicating pregnancy: results of treatment by antithyroid drugs in 77 patients. *Br J Obstet Gynaecol* 87:970-975
  250. Messer PM, Hauffa BP, Olbricht T, Benker G, Kotulla P, Reinwein D 1990 Antithyroid drug treatment of Graves' disease in pregnancy: long-term effects on somatic growth, intellectual development and thyroid function of the offspring. *Acta Endocrinol (Copenh)* 123:311-316
  251. Kriplan A, Buckshee K, Bhargava VL, Takkar D, Ammini AC 1994 Maternal and perinatal outcome in thyrotoxicosis complicating pregnancy. *Eur J Obstet Gynecol* 54:159-163
  252. Mortimer RH, Tyack SA, Galligan JP, Perry-Keene DA, Tan YM 1990 Graves' disease in pregnancy: TSH receptor binding inhibiting immunoglobulins and maternal and neonatal thyroid function. *Clin Endocrinol (Oxf)* 32:141-152
  253. Stagnaro-Green A 1993 Postpartum thyroiditis: prevalence, etiology, and clinical implications. *Thyroid Today* 16:1-11
  254. Feldt-Rasmussen U, Glinoeir D, Orgiazzi J 1993 Reassessment of antithyroid drug therapy of Graves' disease. *Annu Rev Med* 44:323-334
  255. Hidaka Y, Tamaki H, Iwatana Y, Tada H, Mitsuda N, Amino N 1994 Prediction of post-partum Graves' thyrotoxicosis by measurement of thyroid stimulating antibody in early pregnancy. *Clin Endocrinol (Oxf)* 41:15-20
  256. Cooper DS 1987 Antithyroid drugs: to breast-feed or not to breast-feed. *Am J Obstet Gynecol* 157:234-235
  257. Momotani N, Yamashita R, Yoshimoto M, Noh J, Ishikawa N, Ito K 1989 Recovery from foetal hypothyroidism: evidence for the safety of breast-feeding while taking propylthiouracil. *Clin Endocrinol (Oxf)* 31:591-595
  258. Vanderpump MP, Ahlquist JA, Franklyn JA, Clayton RN 1996 Consensus statement for good practice and audit measures in the management of hypothyroidism and hyperthyroidism. *Br Med J* 313:539-544
  259. Goodwin TM, Montoro M, Mestman JH, Pekary AE, Hershman JM 1992 The role of chorionic gonadotropin in transient hyperthyroidism of hyperemesis gravidarum. *J Clin Endocrinol Metab* 75:1333-1337
  260. Kimura M, Amino N, Tamaki H, Ito E, Mitsuda N, Miyai K, Tanizawa O 1993 Gestational thyrotoxicosis and hyperemesis gravidarum: possible role of hCG with higher stimulating activity. *Clin Endocrinol (Oxf)* 38:345-350
  261. Tsuruta E, Tada H, Tamaki H, Kashiwai T, Asahi K, Takeoka K, Mitsuda N, Amino N 1995 Pathogenic role of asialo human chorionic gonadotropin in gestational thyrotoxicosis. *J Clin Endocrinol Metab* 80:350-355
  262. Burrow GN 1986 The thyroid gland and reproduction. In: Yen SS, Jaffe RB (eds) *Reproductive Endocrinology-Physiology, Pathophysiology and Clinical Management*. Saunders, Philadelphia, pp 424-440
  263. Gross S, Librach C, Cecutti A 1989 Maternal weight loss associated with hyperemesis gravidarum: a predictor of fetal outcome. *Am J Obstet Gynecol* 160:906-909
  264. Bashiri A, Neumann L, Maymon E, Katz M 1995 Hyperemesis gravidarum: epidemiologic features, complications and outcome. *Eur J Obstet Gynecol* 63:135-138
  265. Taylor R 1995 Successful management of hyperemesis gravidarum using steroid therapy. *Q J Med* 89:103-107
  266. Jeffcoate WJ 1985 Recurrent pregnancy-induced thyrotoxicosis presenting as hyperemesis gravidarum. Case report. *Br J Obstet Gynaecol* 92:413-415
  267. Evans AJ, Li TC, Selby C, Jeffcoate WJ 1986 Morning sickness and thyroid function. *Br J Obstet Gynaecol* 93:520-522
  268. Wilson R, McKillop JH, Maclean M, Walker JJ, Fraser WD, Gray C, Dryburgh F, Thomson JA 1992 Thyroid function tests are rarely abnormal in patients with severe hyperemesis gravidarum. *Clin Endocrinol (Oxf)* 37:331-334
  269. Valentine BH, Jones C, Tyack AJ 1980 Hyperemesis gravidarum due to thyrotoxicosis. *Postgrad Med J* 56:746-747
  270. Dozeman R, Kaiser FE, Cass O, Pries J 1983 Hyperthyroidism appearing as hyperemesis gravidarum. *Arch Intern Med* 143:2202-2203
  271. Chin RK, Lao TT 1988 Thyroxine concentration and outcome of hyperemetic pregnancies. *Br J Obstet Gynaecol* 95:507-509
  272. Swaminathan R, Chin RK, Lao TT, Mak YT, Panesar NS, Cockram CS 1989 Thyroid function in hyperemesis gravidarum. *Acta Endocrinol (Copenh)* 120:155-160
  273. Shulman A, Shapiro MS, Bahary C, Shenkman L 1989 Abnormal thyroid function in hyperemesis gravidarum. *Acta Obstet Gynecol Scand* 68:533-536
  274. Krentz AJ, Redman H, Taylor K 1994 Hyperthyroidism associated with hyperemesis gravidarum. *Br J Clin Pract* 48:75-76
  275. Mori M, Amino N, Tamaki H, Miyai K, Tanizawa O 1988 Morning sickness and thyroid function in normal pregnancy. *Obstet Gynecol* 72:355-359
  276. Goodwin TM, Hershman JM, Cole L 1994 Increased concentration of the free  $\beta$ -subunit of human chorionic gonadotropin in hyperemesis gravidarum. *Acta Obstet Gynecol Scand* 73:770-772
